1 ***In vivo* identification of apoptotic and extracellular vesicle-bound live cells using**  
2 **image-based deep learning**

3

4 Jan Kranich<sup>1,#,\*</sup>, Nikolaos-Kosmas Chlis<sup>2,#</sup>, Lisa Rausch<sup>1</sup>, Ashretha Latha<sup>1</sup>, Martina  
5 Schifferer<sup>3,4</sup>, Tilman Kurz<sup>1</sup>, Agnieszka Foltyn-Arfa Kia<sup>1</sup>, Mikael Simons<sup>3,4,5</sup>, Fabian J.  
6 Theis<sup>2,6,\*</sup>, Thomas Brocker<sup>1,\*</sup>

7

8 1 Institute for Immunology, Faculty of Medicine, LMU Munich, 82152 Munich, Germany

9 2 Institute of Computational Biology, Helmholtz Zentrum Munich, 85764 Neuherberg,  
10 Germany

11 3 German Center for Neurodegenerative Diseases (DZNE), 81377 Munich, Germany

12 4 Munich Cluster of Systems Neurology (SyNergy), 81377 Munich, Germany

13 5 Institute of Neuronal Cell Biology, Technical University of Munich, 80802 Munich,  
14 Germany

15 6 Department of Mathematics, Technical University of Munich, 85748 Garching, Germany

16 # these authors contributed equally

17 \* corresponding authors

18

19 Lead contact: [tbrocker@med.uni-muenchen.de](mailto:tbrocker@med.uni-muenchen.de)

20

1    **SUMMARY**

2    The *in vivo* detection of dead cells remains a major challenge due to technical hurdles.  
3    Here we present a novel method, where injection of fluorescent Milk fat globule-EGF factor  
4    8 protein (MFG-E8) *in vivo* combined with imaging flow cytometry and deep learning  
5    allows the identification of dead cells based on their surface exposure of  
6    phosphatidylserine (PS) and other image parameters. A convolutional autoencoder (CAE)  
7    was trained on defined pictures and successfully used to identify apoptotic cells *in vivo*.  
8    However, unexpectedly, these analyses also revealed that the great majority of PS<sup>+</sup> cells  
9    were not apoptotic, but rather live cells associated with PS<sup>+</sup> extracellular vesicles (EVs).  
10   During acute viral infection apoptotic cells increased slightly, while up to 30% of  
11   lymphocytes were decorated with PS<sup>+</sup> EVs of Dendritic cell exosomal origin. The  
12   combination of recombinant fluorescent MFG-E8 and the CAE-method will greatly  
13   facilitate analyses of cell death and EVs *in vivo*.

14

15   **Keywords**

16   Extracellular Vesicles, Exosomes, Dendritic cells, Viral Infection, Irradiation, Apoptosis

17

## 1 INTRODUCTION

2 Billions of cells die every day in physiological and developmental processes (Nagata,  
3 2018). Also, during viral infections cells are killed either directly by pathogens or by the  
4 immune system to limit pathogen expansion. However, despite high frequencies of cell  
5 death, it is extremely difficult to detect apoptotic cells *in vivo* (Surh and Sprent, 1994) due  
6 to lack of appropriate detection methods and highly efficient removal of dead cells by  
7 phagocytic macrophages (deCathelineau and Henson, 2003).

8 One hallmark of apoptotic cell death is the exposure of phosphatidylserine (PS) on the  
9 outer membrane surface of cells (Fadok et al., 1992; Martin et al., 1995). In addition to  
10 apoptotic cells, also extracellular vesicles (EVs) are PS<sup>+</sup> (Hugel et al., 2005; Llorente et  
11 al., 2013; Martinez and Freyssinet, 2001; Thery et al., 2002; Wubbolts et al., 2003). EVs  
12 are very heterogeneous (Mathieu et al., 2019) and contain distinct nucleic acid, lipid and  
13 protein cargo derived from parental cells (Jeppesen et al., 2019). They may contribute to  
14 cell-to-cell communication and modulate physiological functions such as immunity, cancer  
15 progression, metastasis and transfer of viral genomes (Altan-Bonnet, 2016; Robbins and  
16 Morelli, 2014; Tkach and Thery, 2016). The concentration of EVs in bodily fluids can  
17 increase during cell death, cancer or infections (Altan-Bonnet, 2016; Robbins and Morelli,  
18 2014). However, the major challenge to understand the role of EVs in biological processes  
19 is to study naturally occurring EVs *in vivo* as well as their target cells. This challenge  
20 remains unsolved, as specific reagents and analysis methods are lacking.

21 Fluorescently labeled Annexin V, which binds to PS, has been used to detect both, PS<sup>+</sup>  
22 apoptotic cells and EVs (Heijnen et al., 1999). However, Annexin V requires elevated  
23 Ca<sup>2+</sup>-concentrations for PS-binding, which generates Ca<sup>2+</sup>-phosphate microprecipitates  
24 of EV-size, which can be mistaken for EVs (Larson et al., 2013). Furthermore, the Ca<sup>2+</sup>-

1 requirement might make *in vivo* applications of Annexin V difficult and could interfere with  
2 many other downstream applications (van Engeland et al., 1998).

3 To reliably analyze PS<sup>+</sup> EVs and dead cells *in vivo*, we have developed a recombinant  
4 PS-staining reagent by fusing Milk fat globule-EGF factor 8 protein (MFG-E8) (Hanayama  
5 et al., 2002) to enhanced green fluorescent protein (eGFP). MFG-E8 binds PS in a Ca<sup>2+</sup>-  
6 independent fashion with high sensitivity (Otzen et al., 2012) and already on early  
7 apoptotic cells (Shi et al., 2006). Furthermore, it binds to highly curved membranes (Shi  
8 et al., 2004), as those of small EVs.

9 Upon intravenous injection of MFG-E8-eGFP we performed imaging flow cytometry of  
10 fresh tissue cells on an ImageStream<sup>x</sup> MarkII imaging cytometer, which allows detection  
11 of small particles with high sensitivity (Headland et al., 2014) and generates detailed  
12 images of individual cells (Pepperkok and Ellenberg, 2006). To automatically classify  
13 apoptotic vs. EV-decorated (EV<sup>+</sup>) cells, we developed a convolutional autoencoder (CAE)  
14 (Hinton and Salakhutdinov, 2006; Masci et al., 2011; Ranzato et al., 2007), which  
15 combines the advantages of traditional feature extraction (Blasi et al., 2016; Dao et al.,  
16 2016; Eliceiri et al., 2012) and deep learning (Eulenberg et al., 2017) for imaging flow  
17 cytometry. Using this pipeline, we show that MFG-E8-eGFP detects apoptotic as well as  
18 EV<sup>+</sup> cells *in vivo*. In untreated mice EV<sup>+</sup> hematopoietic cells are readily detectable at low  
19 frequencies *in vivo*. In contrast, irradiation or infection of mice with Lymphocytic  
20 choriomeningitis virus (LCMV) dramatically raised the frequencies of apoptotic and EV<sup>+</sup>  
21 cells. Here, we analyzed B cells, DCs and T-cells among which we detected a striking  
22 increase of EV<sup>+</sup> cells.

23 We provide a novel recombinant PS-binding molecule MFG-E8-eGFP, which, in  
24 combination with the deep learning CAE tool will give valuable information on the

- 1 generation and function of EVs as well as on their target-cell specificities and will be most
- 2 suitable to identify cell death *in vivo*.
- 3

## 1 MATERIALS AND METHODS

2

3 **Mice.** C56BL/6 mice were analyzed in sex and age-matched groups of 8–10 weeks of  
4 age. The SPF-status of the facility was tested according to the Federation for Laboratory  
5 Animal Science Associations (FELASA) recommendations. Animal experiment  
6 permissions were granted by the animal ethics committee of the Regierung von  
7 Oberbayern, Munich, Germany. All mice were bred and maintained at the animal facility  
8 of the Institute for Immunology, Ludwig-Maximilians-Universität München

9

10 **Generation of MFG-E8-eGFP.** Murine MFG-E8-eGFP was produced from stably  
11 transfected HEK293 cells or purchased (#2002100; Bioconduct, France). Cells were  
12 grown in a Labfors Bioreactor (Infors, Switzerland) in serum-free medium (Ex-Cell 293,  
13 Sigma) for 5 days. Cells were removed from the cell culture supernatant (SN) by  
14 centrifugation (300g, 10min). 0.1% Triton-X 100 was added to solubilize membrane  
15 vesicles. SN was incubated under agitation for 1h. Debris was cleared by a high-speed  
16 centrifugation (40.000g, 60min) and filtration (0.2µm). MFG-E8-eGFP was then purified  
17 by FLAG affinity chromatography using M2-FLAG agarose beads (Sigma). Bound protein  
18 was eluted using an excess of FLAG peptide (Genscript, China). The eluate was  
19 concentrated using Sartorius spin columns with a cutoff of 30kDa (Sartorius). Lastly, MFG-  
20 E8-eGFP was further purified by gel filtration on an Äkta prime system with a Superdex  
21 200 Increase 10/300 GL column (GE Healthcare).

22

23 **LCMV infections.** LCMV Armstrong was propagated on L929 cells. Stocks were frozen  
24 at -80°C. For quantitation of virus titers focus-forming assays using Vero cells were

1 performed as described previously (Pellegrini et al., 2011) . For injections, viral stocks  
2 were diluted in sterile PBS.  $2 \times 10^5$  p.f.u. were injected intraperitoneally per mouse.

3

4 **Preparation of single cells suspensions.** Single cell suspensions of spleen and  
5 thymocytes were prepared by meshing organs through a  $100\mu\text{m}$  nylon mesh. BM cells  
6 were flushed out from femur and tibia with PBS + 2%FCS using syringes. Erythrocytes  
7 were removed by centrifugation through a Pancoll cushion (Pancoll, PAN Biotech).  
8 Number of live cell was determined using a CASY cell counter (OMNI Life Science).

9

10 **FACS sorting of MFG-E8<sup>+</sup> splenocytes and subsequent TEM.** Single cell suspensions  
11 of splenocytes from LCMV infected, MFG-E8-eGFP injected mice were prepared by  
12 meshing organs through a nylon mesh and placed in PBS + 0.5% BSA. Erythrocytes were  
13 removed by centrifugation through a Pancoll cushion (Pancoll, PAN Biotech). Number of  
14 live cells was determined using a CASY cell counter (OMNI Life Science). Cells were  
15 stained with anti-CD45 APC, live/dead violet and anti-GFP FITC. After washing, cells were  
16 prefixed in 4% EM-grade PFA (Science Services) for 20 min before sorting. Cells were  
17 sorted on a FACSAriaIII (BDBiosciences) using a  $130\mu\text{m}$  nozzle to keep shear forces to  
18 a minimum to avoid tearing off of the EVs. Cells were sorted into PBS + 0.5% BSA and  
19 pelleted at 300g. The cells were kept pelleted throughout all fixation, contrasting and  
20 infiltration steps. Cells were fixed for 15 min in 2.5% glutaraldehyde (EM-grade, Science  
21 Services) in 0.1 M sodium cacodylate buffer (pH 7.4) (Sigma Aldrich), washed three times  
22 in 0.1 M sodium cacodylate buffer before postfixation in reduced osmium (1% osmium  
23 tetroxide (Science Services), 0.8% potassium ferrocyanide (Sigma Aldrich) in 0.1 M

1 sodium cacodylate buffer). After contrasting in 0.5% uranylacetate in water (Science  
2 Services), the pellet was dehydrated in an ascending ethanol series, infiltrated in epon  
3 (Serva) and cured for 48h at 60°C. Ultrathin sections (50nm) were deposited onto formvar-  
4 coated copper grids (Plano) and postcontrasted using 1% uranyl acetate in water and  
5 ultrostain (Leica). TEM images were acquired on a JEM 1400plus (JEOL) using the  
6 TEMCenter and tile scans with the ShotMeister software packages (JEOL), respectively.

7  
8 **Imaging flow cytometry and data analysis.**  $5 \times 10^6$  cells were stained with appropriate  
9 antibodies for 20min on ice in PBS + 2% FCS and analyzed on an ImageStream<sup>X</sup> MKII  
10 imaging flow cytometer (Merck). Mfge8-eGFP<sup>+</sup> cells were gated using the IDEAS  
11 software. Then TIF-images of Mfge8-eGFP<sup>+</sup> cells from each sample were exported (16-  
12 bit, raw) and analyzed by the CAE using a graphical user interface. The results were  
13 stored in two separated \*.pop files containing the object numbers of apoptotic and EV-  
14 decorated cells. These object numbers were re-imported into IDEAS and two separate  
15 files containing only apoptotic or EV-decorated were generated. Next, from each sample,  
16 three files (one containing all cells, one containing only apoptotic cells and one containing  
17 only EV-decorated cells) were exported as fcs-files which were then further analyzed  
18 using FlowJo.

19

## 20 **Preparation of PKH26-stained EVs**

21  $40 \times 10^6$  thymocytes were labelled with PKH26 red (Sigma Aldrich) according to the  
22 manufacturer's protocol. Briefly, the cell suspension was washed with a serum-free DMEM  
23 medium (GIBCO) and resuspended in 1 ml of dilution buffer from the manufacturer's



1 labeling kit. The cell suspension was mixed with an equal volume of the labeling solution  
2 in the dilution buffer and incubated for 5 min at RT. Labeling reaction was stopped by  
3 addition of 2 ml fetal bovine serum (FBS) followed by with washing complete DMEM (10%  
4 FBS, 1% Penicillin). To induce apoptosis, cells were treated with 1 $\mu$ g/ml of Staurosporine  
5 (Sigma Aldrich) in serum free DMEM for 2 hours at 37 $^{\circ}$ c followed by three washes. Cells  
6 were removed by centrifugation (500g). To collect PKH26-labeled vesicles, including  
7 apoptotic bodies, supernatant was ultra-centrifuged at 100,000g for 90 min. Prior to  
8 injection into mice, vesicles were resuspended in PBS.

9  
10 **Data sets used for deep learning.** All datasets examined in this study were acquired  
11 using the ImageStream<sup>X</sup> MKII (Luminex). For the machine learning approach only  
12 brightfield images and MFG-E8-eGFP<sup>+</sup> or PKH26<sup>+</sup> fluorescent images were used. All  
13 images were cropped to 32x32 pixels and exported as 16-bit raw TIF images. No further  
14 pre-processing was performed on the pixel intensities (e.g. normalization or scaling). The  
15 *in vitro* annotated training dataset D1 consists of 27639 cells (27224 apoptotic, 415 EV<sup>+</sup>).  
16 The apoptotic cells in this dataset were stained with MFG-E8-eGFP *in vitro*, while the 415  
17 EV<sup>+</sup> cells were prepared from splenocytes after injection of PKH26-labeled vesicles. The  
18 *in vivo* annotated dataset D2 consists of 200 cells (100 apoptotic, 100 EV<sup>+</sup>). The M4 *in*  
19 *vivo* dataset consists of 382 cells (199 apoptotic, 183 EV<sup>+</sup>). The M1, M2, and M3 datasets  
20 were BM cells acquired from 3 irradiated mice and consist of 14922, 16545 and 17111  
21 unannotated cells, respectively. The M5 and M6 datasets were acquired from BM of two  
22 non-irradiated mice and consist of 5805 and 5046 unannotated cells, respectively.  
23 Datasets D1 and D2 were imaged with a 40x objective, while datasets M1, M2, M3, M4,  
24 M5 and M6 were imaged with a 60x objective.

1

2 **Data analysis strategy.** A novel pipeline combining unsupervised deep learning with  
3 supervised classification is used for cell classification, and compared to deep learning and  
4 classical feature based classification.

5 **Convolutional Autoencoder (CAE):** The CAE used in this study consists of a typical  
6 encoder-decoder scheme but with a channel-wise adaption: the encoder part is different  
7 for each input channel, while the decoder part of the network is used only during training,  
8 not for testing. The CAE was trained on 90% of M1 for 300 epochs, while the instance of  
9 the network that performed the best on the 10% validation set of M1 was saved and used  
10 for feature extraction in all subsequent experiments. The CAE consists of approximately  
11 200,000 parameters and the exact architecture is shown in supplementary Figure S2.  
12 Each convolutional layer is followed by a batch normalization layer [batchnorm] and a  
13 ReLU activation [relu-glorot], with the exception of the last convolutional layer which is  
14 followed by a linear (activation) function (and no batch normalization). The mean squared  
15 error (MSE) of the reconstructed image was used as a loss function for training, while the  
16 mean absolute error (MAE) produced similar results in terms of classification accuracy.  
17 Adam [adam] was used to train the network, using a batch size of 64.

18

19 **Convolutional Neural Network (CNN):** The CNN used in this study for comparison is the  
20 exact same architecture as in (Eulenberg et al., 2017) and consists of approximately 3  
21 million parameters. For comparison to the CAE, we also implemented a smaller version  
22 of the CNN architecture where each layer of the original architecture had 1/4 of the  
23 parameters, which resulted in a model with approximately 200 thousand parameters

1 (same as the CAE). There was no significant difference between the performance of the  
2 original and downsized variants of the CNN in any of the experiments. As such, only the  
3 results of the original variant of the CNN are reported. This specific CNN architecture  
4 receives 64x64 images as input, while the available images are 32x32. As a result, all  
5 input images were padded with their edge values to fit the input dimension of the network.  
6 In all experiments the CNN was trained using Adam (Kingma and Ba, 2014) .

7  
8 **Cell-Profiler features:** To compare to classical machine learning, the Cell-Profiler (CP)  
9 (Dao et al., 2016) pipeline from Blasi et al. (Blasi et al., 2016) was used for feature  
10 extraction. However, in our case the second channel corresponds to fluorescence  
11 intensity instead of darkfield.

12  
13 **Random Forest:** The scikit-learn (Pedregosa et al., 2011) Python implementation of the  
14 Random Forest (Breiman, 2001) algorithm was used. The number of trees (`n_estimators`)  
15 was set to 1000, while the number of features to assess at each split (`max_features`) was  
16 set to 'sqrt'. In all subsequent experiments when we refer to CAE or CP accuracy, we  
17 mean the accuracy obtained by a Random Forest trained on the pretrained CAE (CAE-  
18 RF model) features or CP features (CP-RF model), respectively.

19  
20 **CAE-RF/CP-RF:** Both terms refer to a random forest trained on top of the features  
21 extracted using the pre-trained CAE introduced above or using Cell-Profiler, respectively.  
22 As such, training CAE-RF/CP-RF refers to training only the classification part of the  
23 method (RF).

24

1 **Confidence Intervals:** Wilson's method (Wilson, 1927) was used to calculate the  
2 proportion confidence intervals for classification accuracy.

3

4 **Code availability:** The source code of this study is freely available at

5 "<https://github.com/theislab/dali>"

6

7

## 1 RESULTS

2

### 3 **MFG-E8-eGFP stains dying and PS<sup>+</sup> live cells *in vivo*.**

4 To develop a robust, buffer-insensitive, fluorescent *in vivo* detection reagent for apoptotic  
5 cells, we fused murine MFG-E8 to enhanced green fluorescent protein (eGFP) for  
6 recombinant expression (Suppl. Fig. 1). The recombinant protein consisted of the full  
7 length MFG-E8 protein containing both C-domains (C1 and C2), of which especially the  
8 C2 domain confers PS-binding (Andersen et al., 2000). In addition, it contained the RGD-  
9 motif, which mediates binding to  $\alpha_v\beta_3$  integrin and facilitates phagocytosis of dead cells  
10 by macrophages (Hanayama et al., 2002). The purified MFG-E8-eGFP could identify  
11 similar frequencies of dying cells, as compared to the commercially available Annexin V  
12 *in vitro* (Fig. 1A). Double staining with both reagents showed that the same apoptotic cells  
13 bind Annexin V and MFG-E8-eGFP, when tested in a Ca<sup>2+</sup>-rich Annexin V-binding buffer  
14 (Fig. 1A). However, when conventional buffer was used, only MFG-E8-eGFP, but not  
15 Annexin V could detect apoptotic cells (Fig. 1A). This data indicates that MFG-E8-eGFP  
16 detects the entirety of dying cells similar to the reference reagent independently of specific  
17 buffer conditions.

18 The RGD-motif present in MFG-E8-eGFP can potentially also bind to  $\alpha_v\beta_3$  and  $\alpha_v\beta_5$   
19 integrins (Hanayama et al., 2002). To test if such binding might cause false-positive  
20 labeling of cells, we next stained spleen cells with anti- $\alpha_v$  (CD51) antibody, which mainly  
21 stained CD11b<sup>+</sup> macrophages and monocytes (Fig. 1B, left panel). However, MFG-E8-  
22 eGFP only revealed CD11b<sup>+</sup>CD51<sup>+</sup> cells, which were also Annexin V<sup>+</sup> (Fig. 1B, right  
23 panel), indicating PS-specificity of MFG-E8-eGFP rather than binding via integrins.

24

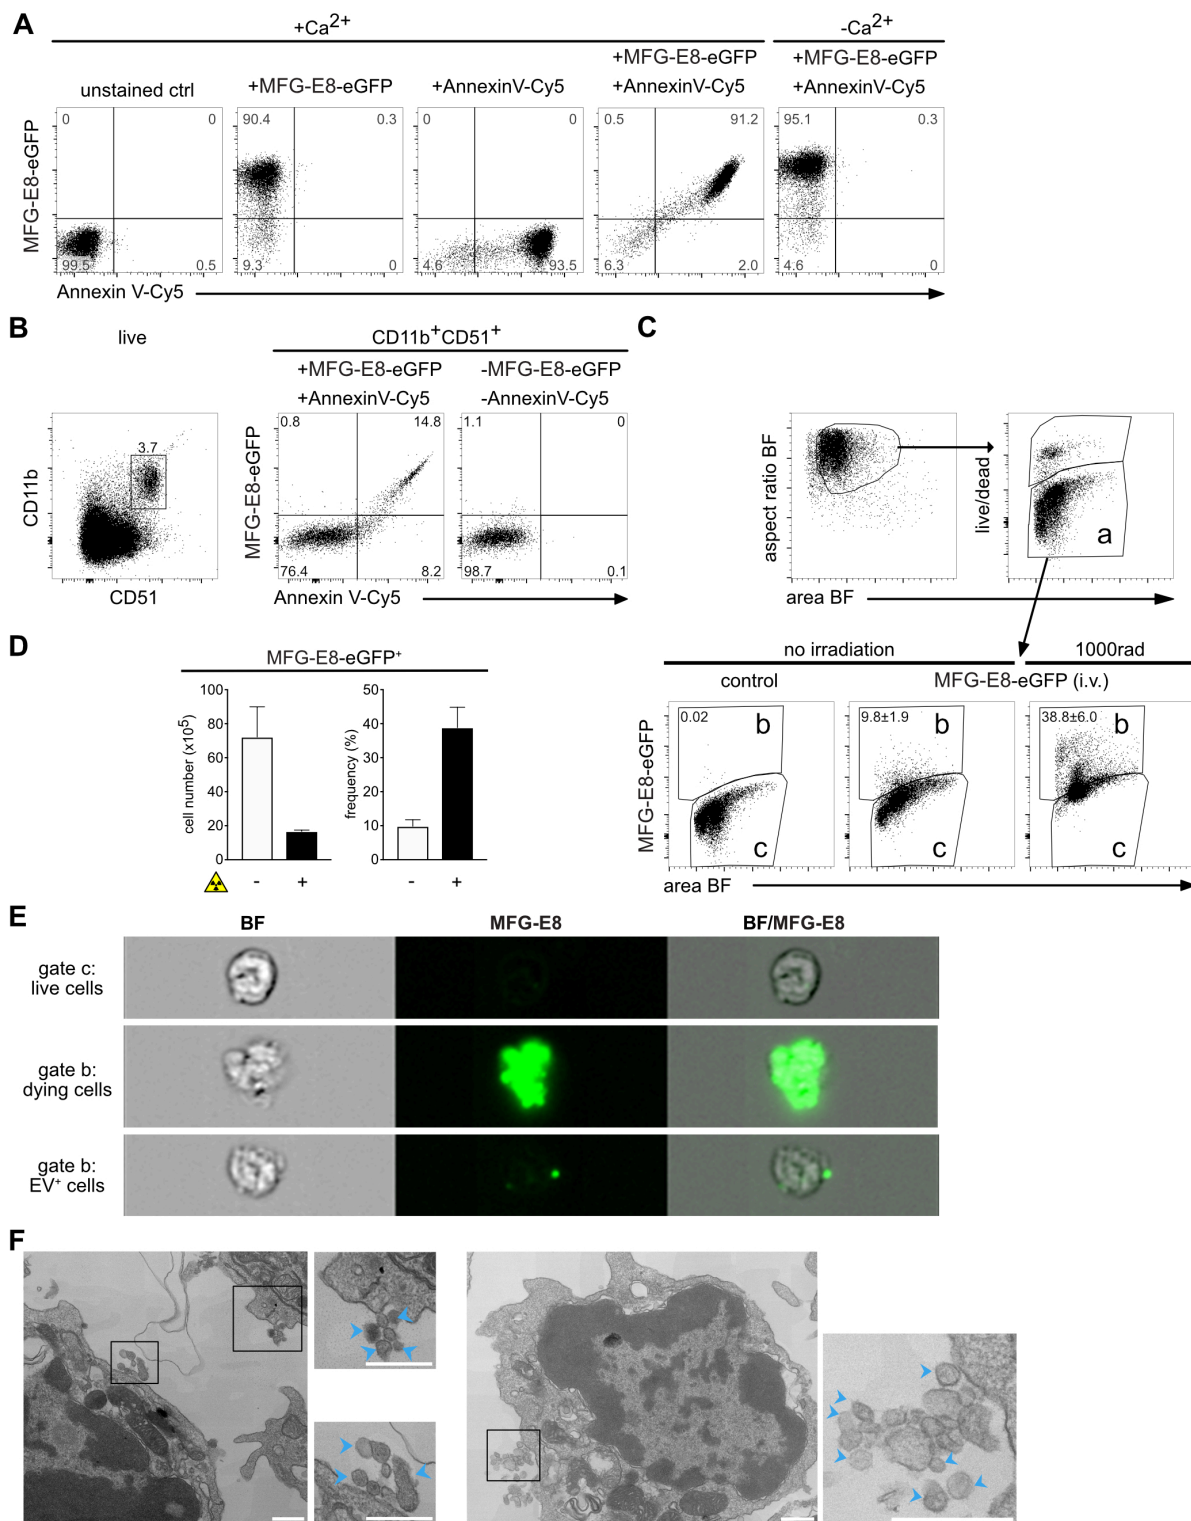

1 Figure 1

2 **Figure 1. MFG-E8-eGFP stains apoptotic and EV<sup>+</sup> cells *in vitro* and *in vivo*.** (A)

3 Staurosporine-treated (1 $\mu$ g/ml, 2h) apoptotic Jurkat cells were stained either with Annexin

1 V-Cy5 or MFG-E8-eGFP or both reagents together in  $\text{Ca}^{2+}$ -containing or  $\text{Ca}^{2+}$ -free buffer  
2 as indicated. (B) To determine the degree of MFG-E8-eGFP binding by integrins via its  
3 RGD-motif by CD51 expressing cells, freshly isolated splenocytes were stained with MFG-  
4 E8-eGFP, AnnexinV, CD11b and CD51. Left dot plot shows gating of  $\text{CD11b}^+\text{CD51}^+$  cells,  
5 middle plot shows MFG-E8-eGFP and Annexin V staining of  $\text{CD11b}^+\text{CD51}^+$  cells, right  
6 plot shows unstained control. (C-D) To test MFG-E8-eGFP *in vivo* non-irradiated (n=3)  
7 and irradiated mice (1000rad, n=3) were injected with 100 $\mu\text{g}$  MFG-E8-eGFP i.v. 24h after  
8 the irradiation. 30min after the MFG-E8 injection mice were sacrificed and bone marrow  
9 (BM) cells were stained with live/dead violet and MFG-E8-eGFP followed by imaging flow  
10 cytometry on an Imagestream<sup>X</sup> Mark II. Bar graphs display total numbers (left) and  
11 frequencies (right) of MFG-E8<sup>+</sup> cells with and without irradiation. Averages  $\pm$  SD are  
12 shown. (E) BF and MFG-E8 images of live, MFG-E8<sup>-</sup> (top), MFG-E8<sup>+</sup> apoptotic (middle)  
13 and MFG-E8<sup>+</sup>EV<sup>+</sup> (bottom) are shown. Scale bar: 7 $\mu\text{m}$ . (F) MFG-E8<sup>+</sup> splenocytes were  
14 FACS-sorted (sorting strategy see Supplemental Fig. 2) and imaged by TEM. Two  
15 representative images of cells with attached extracellular vesicles (indicated by blue  
16 arrows) are shown. Scale bars: 500nm.  
17

18 Next, we administered MFG-E8-eGFP iv for *in vivo* labeling in order to avoid detection of  
19 artifacts generated during organ preparation, cell straining and other stress by *in vitro*  
20 handling. 30min after injection of MFG-E8-eGFP, bone marrow (BM) cells were harvested,  
21 stained *in vitro* with a viability dye (live/dead) to exclude necrotic cells (Fig. 1C, gate a).  
22 Due to their ruptured cell membranes we considered necrotic cells to be too damaged to  
23 extract reliable information and we focused only on live/dead<sup>-</sup> cells in the live gate (Fig.  
24 1C, gate a). Dying cells are rare in intact tissues due to their rapid removal (Henson and  
25 Hume, 2006). Accordingly, only approximately 10% of all BM cells in non-irradiated mice  
26 were MFG-E8-eGFP<sup>+</sup> (Fig. 1C, gate b). To increase the rate of cell death, mice were  $\gamma$ -  
27 irradiated, which causes DNA damage and p53-mediated mechanisms of apoptosis within  
28 hours (Eriksson and Stigbrand, 2010). Therefore, while after irradiation the absolute  
29 numbers of live cells in the BM decreased due to cell death (Fig. 1D), the frequencies of  
30 MFG-E8-eGFP<sup>+</sup> cells strongly increased (Fig. 1C,D). This indicated the general feasibility  
31 and specificity of an MFG-E8-eGFP *in vivo* application.

1 The individual images taken from cells within the live populations of Fig. 1C (gates a,b)  
2 showed that MFG-E8-eGFP<sup>-</sup> cells had an intact rounded morphology typical for live cells  
3 (Fig. 1E). In contrast, MFG-E8-eGFP<sup>+</sup> cells had cell bodies that were stained almost  
4 completely with MFG-E8-eGFP and showed densely stained apoptotic blebs indicating  
5 that cells are undergoing apoptosis (Fig. 1E, middle panel). However, within the same  
6 gate (Fig. 1E, gate b) we also found high numbers of cells that only showed very few, or  
7 even only one intensely stained MFG-E8-eGFP<sup>+</sup> structure of subcellular size, whereas  
8 their cell body was unstained and had the rounded morphology of live, intact cells (Fig.  
9 1E, lower panel). These particles were reminiscent of EVs and we next sorted MFG-E8<sup>+</sup>  
10 lymphocytes from spleens for analysis by transmission electron microscopy (TEM).  
11 Attached to the sorted cells we could readily identify extracellular particles of 50-100nm  
12 diameter, a size typical for EVs (Fig. 1F). Therefore, MFG-E8-eGFP allows the analysis  
13 of apoptotic and PS<sup>+</sup> EV-decorated live cells and we next set out to characterize them in  
14 more detail.

15

16 **An interpretable deep learning approach is able to discriminate EV-decorated cells**  
17 **from dying cells.**

18 The imaging analysis software IDEAS is very powerful in extracting and identifying  
19 features that help to discriminate different cell subsets (George et al., 2004). To generate  
20 a mask for separation of MFG-E8-eGFP<sup>+</sup> cells into PS<sup>+</sup> EV<sup>+</sup> live or PS<sup>+</sup> apoptotic cells, we  
21 manually selected 50 images of each type of MFG-E8-eGFP<sup>+</sup> cells and analyzed their  
22 brightfield and fluorescence characteristics (Suppl. Fig. 3A). Based on the manually  
23 selected MFG-E8-eGFP<sup>+</sup> apoptotic and EV<sup>+</sup> cells we generated gates that included the



1 majority of each cell type (Suppl. Fig. 3B). However, when we applied these definitions to  
2 cells without manual preselection in an unbiased fashion, these gates were insufficient to  
3 classify all events, leaving many cells uncategorized (Suppl. Fig. 3C).

4 To identify more reliable features for apoptotic cell discrimination from EV<sup>+</sup> cells, we  
5 defined a “ground truth” as a basis for training different classification methods for cell  
6 sorting. For this, we generated EVs *in vitro*, fluorescently labeled them with PKH26 and  
7 injected these EVs into mice (Fig. 2A). Dead cells were defined using staurosporine  
8 treated thymocytes stained with MFG-E8-eGFP in addition to the apoptotic marker active  
9 caspase-8 (aCas8) (Ashkenazi and Salvesen, 2014) *in vitro* (Fig. 2B). We next tested  
10 three different machine learning approaches with these data: (i) a Convolutional Neural  
11 Network (CNN) for imaging flow cytometry (Eulenberg et al., 2017), (ii) our proposed  
12 method CAE-RF (a classifier trained on features learned by a CAE as displayed in the  
13 scheme of Fig. 2 (C,D) (iii) CP-RF, a classifier trained on pre-defined Cell Profiler features  
14 (Blasi et al., 2016). In order to estimate the effect of inter-experiment batch effects on  
15 classification performance, all methods were tested twice on the same *in vivo* stained  
16 dataset (manually selected apoptotic and EV<sup>+</sup> cells from irradiated mice) and their  
17 performance was assessed using the Area Under of the receiver operating characteristic  
18 curve (AUC) (Hastie et al., 2009). During the first trial both, the training (MFG-E8-eGFP<sup>+</sup>  
19 BM cells from irradiated mice) and test experiments were stained *in vivo*. In this case, all  
20 methods achieved near perfect classification performance of AUC>0.99 (Fig. 2E). During  
21 the second trial, the apoptotic cells of the training experiment were stained *in vitro* (Fig.  
22 2B), introducing a batch effect for the classifiers to overcome (Fig. 2F). In this case, CAE-  
23 RF generalized the best (Fig. 2E; AUC=0.854), followed by the CNN (Fig. 2E;  
24 AUC=0.811), while CP-RF failed to generalize to the new experiment

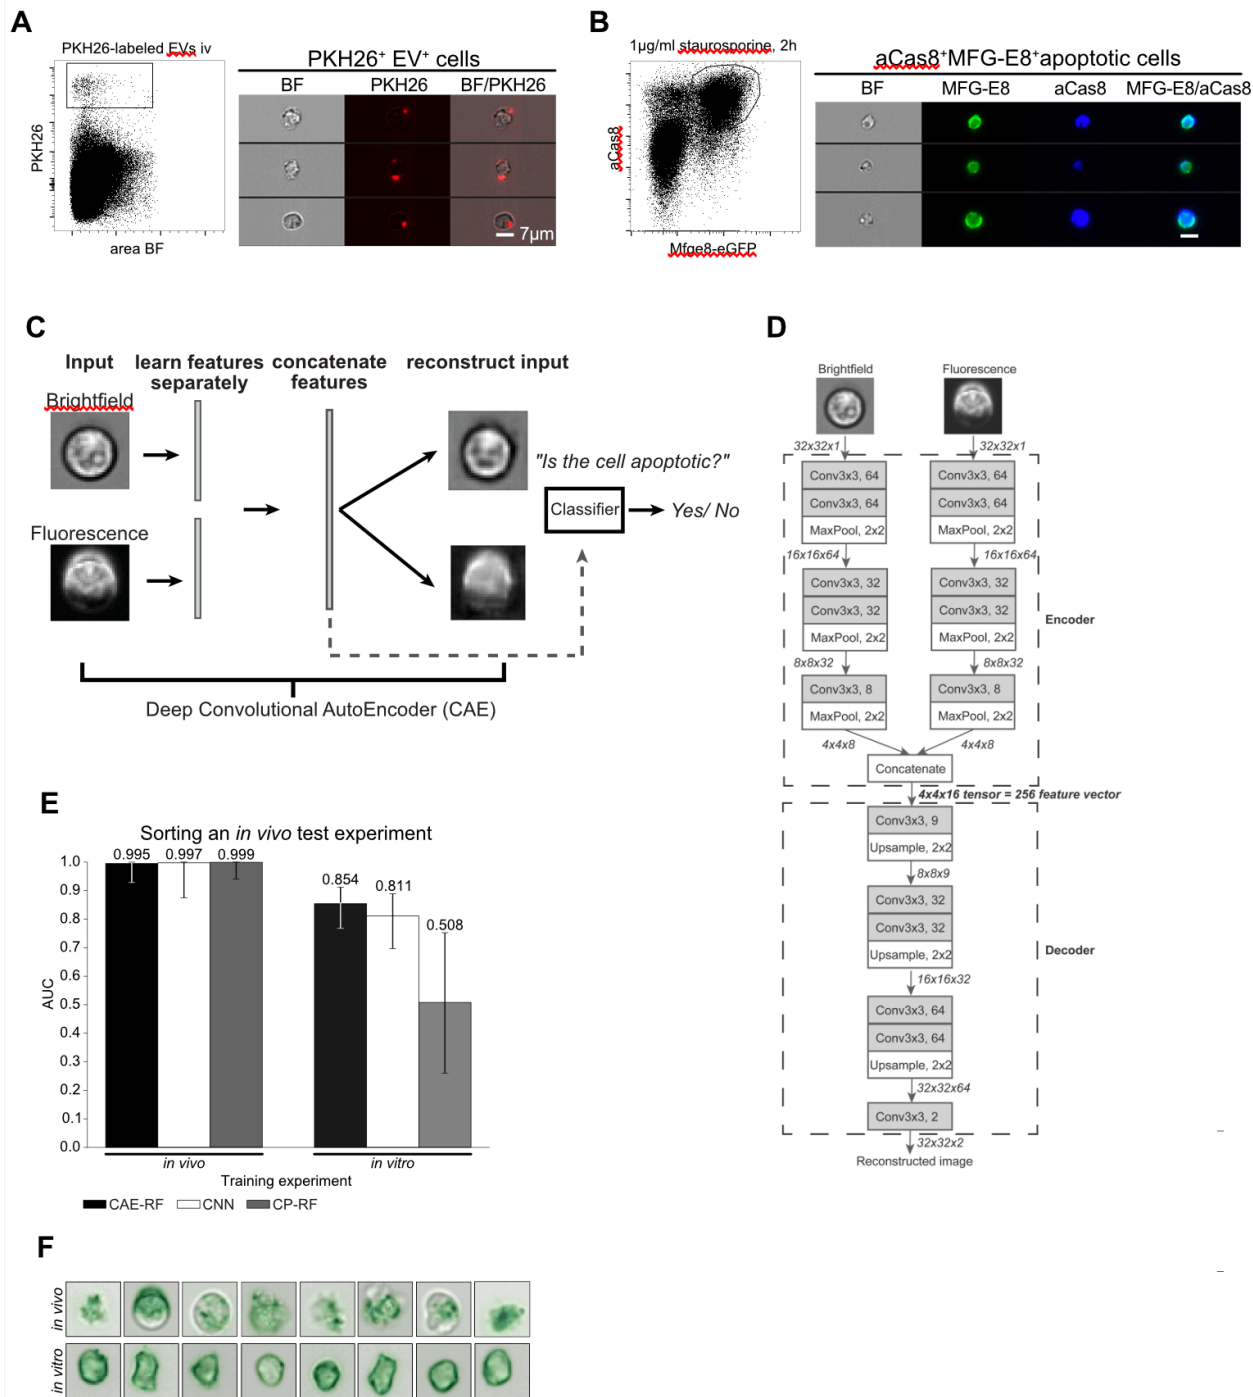

1

2 **Figure 2. Discrimination of apoptotic vs. EV<sup>+</sup> cell using machine learning.**  
 3 (A) To define a truth population for cells carrying EVs, PKH26-labeled EVs from  
 4 staurosporine-treated thymocytes were injected i.v. into C56BL/6 mice. After 1h spleens  
 5 were removed and analyzed by imaging flow cytometry. Images show splenocytes that  
 6 are decorated with *in vitro* generated, PKH26-labeled EVs. (B) To define a truth population  
 7 for apoptotic cells, staurosporine-treated thymocytes (1µg/ml for 2h) were stained with  
 8 MFG-E8-eGFP (200ng/ml) and anti-aCas8 and analyzed by imaging flow cytometry.

1 Images show MFG-E8-eGFP<sup>a</sup>Cas8<sup>+</sup> apoptotic cells. (C) Using a Convolutional  
2 Autoencoder (CAE), both channels of the same image are separately encoded and then  
3 concatenated to form a 256-dimensional feature vector. During training features are  
4 learned in an unsupervised manner, by reconstructing the input images. In order to  
5 perform cell sorting, a classifier (Random Forest) is trained on a small subset of annotated  
6 cells. (D) Each input image consists of 32x32 pixels and 2 channels (Brightfield,  
7 Fluorescence). Every arrow in the figure corresponds to a data tensor. Each channel is  
8 encoded separately by an encoder network consisting of alternating convolutional and  
9 pooling layers. The encoder compresses each 32x32x1 (32x32 pixels, 1 channel) image  
10 into a 4x4x8 tensor. The encoded tensors of both channels are concatenated in a 4x4x16  
11 tensor: the bottleneck of the CAE, which has a dual purpose. At training time, it is fed into  
12 the decoder part of the network which aims to reconstruct the input image in an  
13 unsupervised manner. At test time, the 4x4x16 bottleneck tensor is reshaped into the 256-  
14 dimensional feature vector of the input image that can be used in downstream tasks, such  
15 as classification of cell-subtypes. Each Convolutional layer performs 3x3 convolutions and  
16 is followed by a Batch Normalization layer and a ReLU activation function. The only  
17 exception to this rule is the last Convolutional layer (Conv3x3, 2), which is directly followed  
18 by Linear (identity) activation function. (E) Left: All models were trained on an *in vivo*  
19 stained dataset of 401 cells (M4), then tested on an independent *in vivo* stained dataset  
20 of 200 cells (D2). Right: the same models were trained on a new dataset of 27,639 cells  
21 (D1), where the apoptotic cells were stained *in vitro*, introducing a batch effect. Next, they  
22 were tested on the same 200 cell dataset as before (D2). Sorting performance is displayed  
23 as area under curve (AUC). (F) Demonstration of the batch effect introduced by *in vitro*  
24 staining of apoptotic cells. Right column: random subset of *in vivo* stained apoptotic cells.  
25 Left column: random subset of *in vitro* stained apoptotic cells. *In vitro* stained cells  
26 fluorescent staining is evenly distributed inside the cell, while *in vivo* stained cells exhibit  
27 more complex shapes and abnormalities in the distribution of the fluorescent dye. Error-  
28 bars correspond to 95% Wilson confidence intervals (n=200).  
29

30 and was comparable to random guessing (Fig. 2E; AUC=0.508). CAE-RF was as accurate  
31 as a CNN in identifying apoptotic cells in a new experiment (Fig. 2E).

32

### 33 **For classification MFG-E8 fluorescence is more important than brightfield.**

34 The CAE-RF and CP-RF methods were trained using 5-fold cross validation (Hastie et al.,  
35 2009). Both CAE-RF and CP-RF agreed that features derived from the fluorescence  
36 channel were more important than brightfield features, for the task of apoptotic cell

1 identification (Fig. 3A). Quantitative assessment of CAE-RF performance was

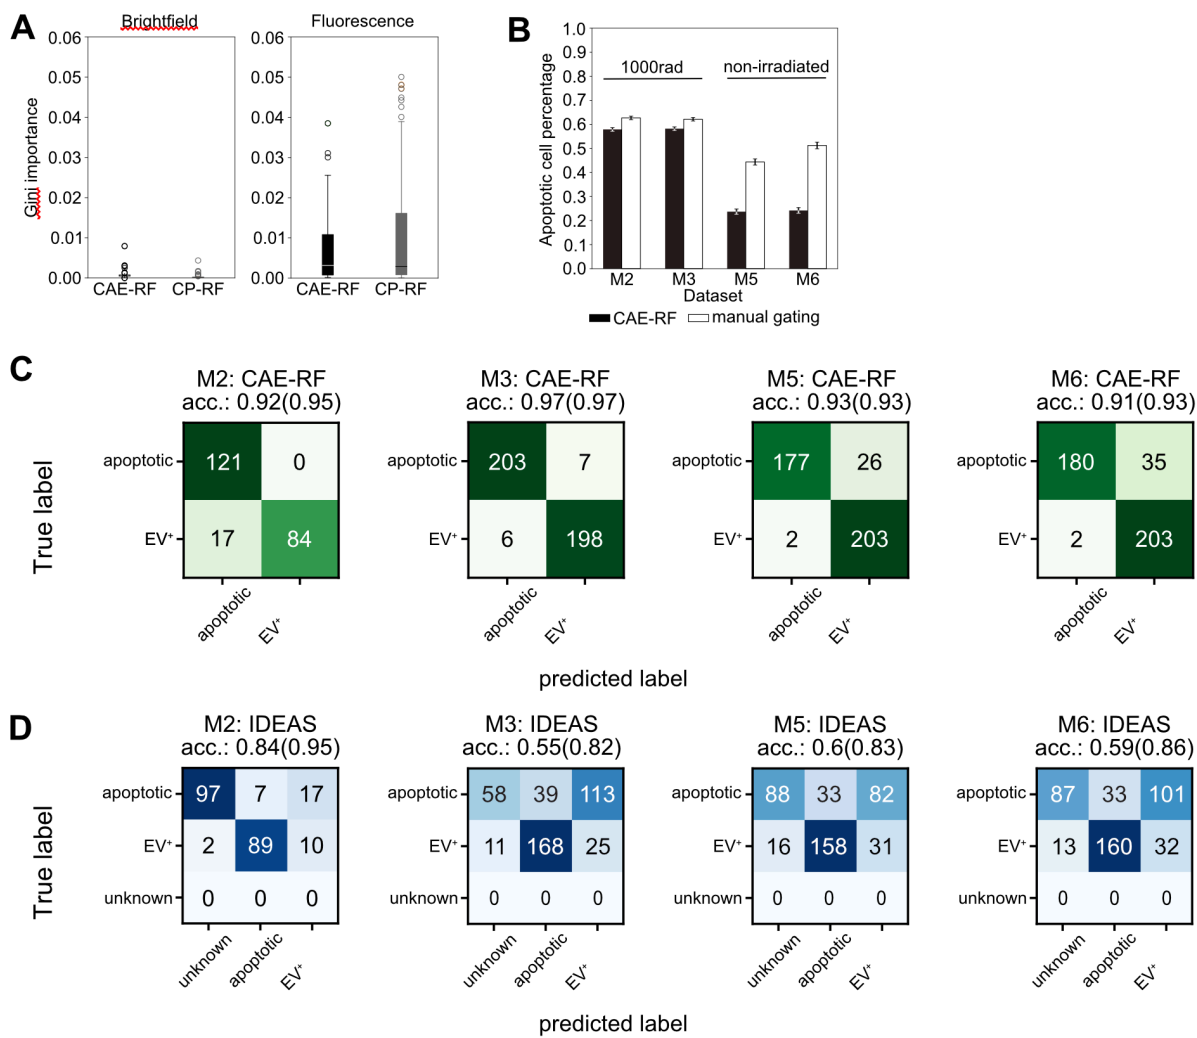

2

### 3 **Figure 3: Convolutional Autoencoder performance.**

4 (A) Both CAE-RF and CP-RF identify the fluorescence channel (FL) features as more important  
 5 than brightfield features (BF) for the task of apoptotic cell detection. Each boxplot visualizes the  
 6 Gini importance of features belonging to the corresponding channel (FL or BF), as calculated by  
 7 the random forest for each feature extraction method (CAE or CP). Fluorescence features have  
 8 larger values of Gini importance than BF features. (B) When predicting on new non-annotated  
 9 data, both CAE-RF classification and manual gating on IDEAS features predict more apoptotic  
 10 cells in irradiated mice (M2, M3) and more cells with attached vesicles in healthy mice (M5, M6).  
 11 Error bars correspond to 95% Wilson confidence intervals ( $n_{M2}=16545$ ,  $n_{M3}=17111$ ,  $n_{M5}=5805$ ,  
 12  $n_{M6}=5046$ ). A subset of cells was annotated manually for each dataset and sorting was performed  
 13 using the CAE-RF (C) and IDEAS gating (D). “Unknown” cells fail to lie on the apoptotic or EV<sup>+</sup>  
 14 gate using IDEAS gating. The classification accuracy reported in parentheses for each confusion  
 15 matrix corresponds to the accuracy if “unknown” cells are omitted.

16

1 done first by training on *in vivo* stained BM cells from irradiated mice. Then it was used to  
2 identify apoptotic and non-apoptotic cells in new experiments with data from irradiated  
3 (Fig. 3B; M2, M3) and non-irradiated mice (Fig. 3B; M5, M6). The performance of CAE-  
4 RF sorting was compared to standard gating on manually defined features (Fig. 3B). Both  
5 methods agree that more apoptotic cells are present in irradiated than in non-irradiated  
6 mice (Fig 3B). Subsequently, a subset of cells was manually annotated for each dataset,  
7 to quantitatively assess the classification performance of both methods CAE-RF (Fig. 3C)  
8 and manual gating using IDEAS features (Fig. 3D). In all cases, sorting with CAE-RF was  
9 more accurate than performing gating (Fig. 3C,D). Moreover, CAE-RF always  
10 characterized all cells, while manual gating resulted in some cells characterized as  
11 “unknown” since they did not correspond to any of the gates (Fig. 3D). Nonetheless, even  
12 if we discard the unknown cells from the calculation of classification accuracy (providing  
13 an advantage to gating), using CAE-RF was still more accurate (Fig. 3D).

14

15 **True dead and live EV<sup>+</sup> cells can be sorted automatically by the novel deep learning**  
16 **approach.**

17 To challenge the accuracy of the CAE classifier, we next submitted image information  
18 from BM cells after irradiation to CAE-RF based sorting. As expected, the frequencies of  
19 live MFG-E8-eGFP<sup>+</sup> cells strongly increased upon irradiation (Fig. 4A, B). Here, only cells  
20 were included that were live/dead<sup>-</sup> apoptotic cells with intact cell membrane. MFG-E8-  
21 eGFP<sup>+</sup> dying apoptotic cells had a higher MFG-E8-eGFP median fluorescence intensity  
22 than EV<sup>+</sup> cells and both types could be clearly separated from each other by using CAE-  
23 RF (Fig. 4A). Although the rates of both, apoptotic as well as live EV<sup>+</sup> cells increased upon  
24 irradiation, the EV<sup>+</sup> cells were by far more frequent than dying cells (Fig. 4B). We analyzed

1 both cell types further and used antibodies to CD11b<sup>+</sup> myeloid cells and B220<sup>+</sup> B  
 2 lymphocytes, as prominent representatives of BM populations (Fig. 4C). As expected, we  
 3 could detect only few B220<sup>+</sup> B cells in irradiated mice (Fig. 4C), but a high frequency of  
 4 them was classified as apoptotic (Fig. 4D, upper panel). This reflected the high sensitivity  
 5 of B cells to  $\gamma$ -irradiation (Heylmann et al., 2014). In contrast, total numbers of myeloid

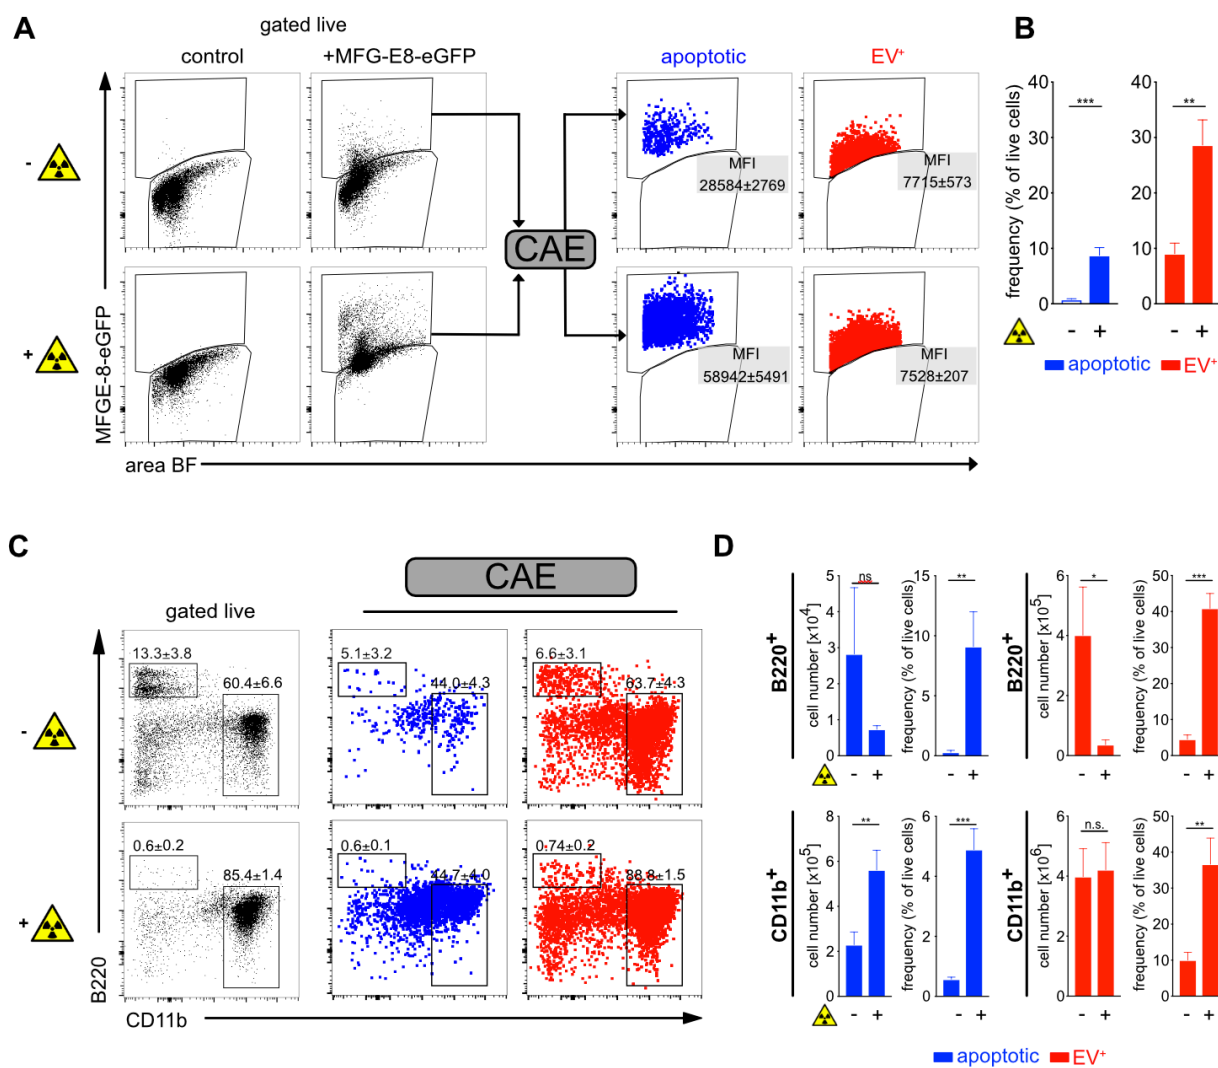

6

7 **Figure 4. Using deep learning to discriminate apoptotic and EV<sup>+</sup> cells.**  
 8 Non-irradiated controls (n=3) and lethally irradiated mice (1000rad, n=3) were injected  
 9 with 100 $\mu$ g MFG-E8-eGFP i.v. 24h after the irradiation. 30min later mice were sacrificed.  
 10 Bone marrow (BM) cells were analyzed by imaging flow cytometry. (A) To identify  
 11 apoptotic and EV<sup>+</sup> cells, cells were analyzed using IDEAS, CAE-RF and FlowJo. First,  
 12 single cells were gated using the brightfield (BF) aspect ratio and the area of the BF signal.

1 Then necrotic cells (live/dead<sup>+</sup>) were excluded from further analysis (Suppl. Fig. 5A).  
2 MFG-E8-eGFP<sup>+</sup> cells were gated and their TIF images (16-bit, raw) exported using the  
3 IDEAS software. CAE-RF results with the classification apoptotic/EV<sup>+</sup> were re-imported  
4 into IDEAS and separate fcs-files containing all cells or only MFG-E8-eGFP<sup>+</sup>/apoptotic  
5 cells and MFG-E8-eGFP<sup>+</sup>/EV<sup>+</sup> cells were generated for further analysis in FlowJo.  
6 Apoptotic (blue) and EV<sup>+</sup> (red) cells are shown in dot plots and their MFI of the MFG-E8  
7 signal is displayed. (B) Bar graphs show apoptotic (blue) and EV<sup>+</sup> (red) cells as frequency  
8 of live cells in non-irradiated and irradiated mice. Averages  $\pm$  SD are shown. (C) Left dot  
9 plots show B220 and CD11b stained BM cells, gated on non-necrotic live/dead<sup>-</sup> cells.  
10 Middle and right dot plots show B220 and CD11b expression of MFG-E8-eGFP<sup>+</sup> cells  
11 classified by the CAE as apoptotic (blue) or EV<sup>+</sup> (red), respectively. (D) Bar graphs show  
12 total numbers and frequencies of B220<sup>+</sup> and CD11b<sup>+</sup> apoptotic (blue) and EV<sup>+</sup> (red) cells  
13 in non-irradiated and irradiated mice. Bar graphs show means  $\pm$  SD, n=3.

14  
15 CD11b<sup>+</sup> cells were less decreased, as they have lower sensitivity to  $\gamma$ -irradiation  
16 (Rodrigues-Moreira et al., 2017) (Fig. 4D). However, also in the CD11b<sup>+</sup> myeloid  
17 compartment, the frequencies of dying cells increased significantly upon irradiation (Fig.  
18 4C, D). Frequencies of EV<sup>+</sup> live cells also increased significantly in both, CD11b<sup>+</sup> and  
19 B220<sup>+</sup> cells during irradiation (Fig. 4C, D). Taken together, the CAE-RF module is able to  
20 reliably separate EV<sup>+</sup> dying cells from PS<sup>+</sup> live cells and can assist in more precise  
21 analyses of MFG-E8-eGFP<sup>+</sup> cells.

## 22 23 **Distinction of dying from EV-decorated cells during acute infection with LCMV**

24 Having developed a reliable automated method to discriminate apoptotic from EV<sup>+</sup> cells,  
25 we next analyzed spleens of mice during an LCMV infection, which is known to induce  
26 cell death during the acute infection phase (Matter et al., 2006). Here, cell death is mainly  
27 caused by innate and adaptive immune mechanisms (Borrow et al., 1995; Matter et al.,  
28 2006; Odermatt et al., 1991). LCMV infection caused a strong increase in frequencies and  
29 total numbers of live MFG-E8-eGFP<sup>+</sup> cells (Fig. 5A). To differentiate apoptotic from EV<sup>+</sup>  
30 live cells we CAE-sorted their images. This revealed that both, apoptotic as well as EV<sup>+</sup>

1 cells significantly increased upon LCMV infection (Fig. 5B). However, the frequencies of  
 2 PS<sup>+</sup> live cells were more than 10-fold higher as compared to those of apoptotic cells,  
 3 before as well as during an LCMV infection (Fig. 5B). More detailed analysis showed that  
 4 the highest numbers of dying cells in non-infected mice were present within the CD19<sup>+</sup> B  
 5 cell and CD19<sup>-</sup>TCRβ<sup>-</sup> non-B/T cell populations (Fig. 5C). Upon LCMV infection, both, dying

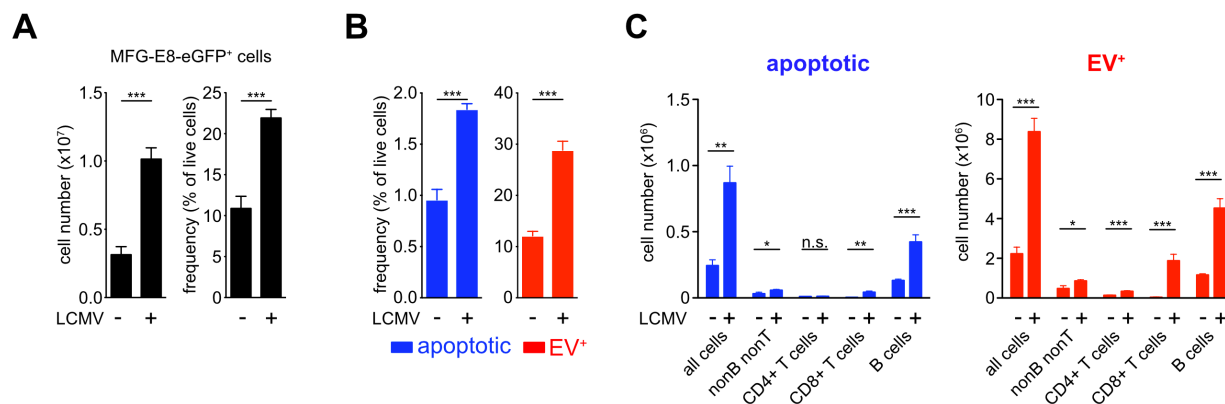

6  
 7 **Figure 5. Identification of dying cells and EV<sup>+</sup> cells during LCMV infection.** Non-  
 8 infected and LCMV<sub>Arm</sub> (2x10<sup>5</sup> PFU, i.p.) infected mice were injected with 100μg MFG-E8-  
 9 eGFP on day 5 post infection. 1h later mice were sacrificed and splenic B, T and non-B/T  
 10 cell subsets were analyzed by imaging flow cytometry (gating strategy shown in suppl. Fig  
 11 4). (A) Bar graphs show total numbers (left) and frequencies (right) of all MFG-E8-eGFP<sup>+</sup>  
 12 splenocytes in non-infected and infected mice. (B) Frequencies of MFG-E8-eGFP<sup>+</sup>  
 13 apoptotic (blue) and EV<sup>+</sup> (red) cells were calculated using the CAE. (C) MFG-E8-eGFP<sup>+</sup>  
 14 CD19<sup>-</sup>TCRβ<sup>-</sup> nonB/T cells, CD4<sup>+</sup> and CD8<sup>+</sup> T cells and CD19<sup>+</sup> B cells were classified as  
 15 apoptotic (blue) or EV<sup>+</sup> (red) using the CAE and their total numbers in the spleen were  
 16 calculated. Numbers next to the gate show the mean percentage of 3 mice. Bar graphs  
 17 show averages of 3 mice ± SD. For statistical analysis unpaired Student's T test was used,  
 18 asterisks indicate statistical significance. Representative results of 3 independent  
 19 experiments are shown.

20  
 21  
 22 and live EV<sup>+</sup>CD19<sup>+</sup> B cell and CD19<sup>-</sup>TCRβ<sup>-</sup> non-B/T cells further increased, but live EV<sup>+</sup> B  
 23 cells outnumbered dying B cells approximately 10-fold (Fig. 5C). In addition, especially  
 24 CD8<sup>+</sup> T cells showed increased frequencies of apoptosis and EV-decoration upon LCMV  
 25 infection (Fig. 5C). We next analyzed individual populations in more detail.



1  
2  
3 **Detailed analyses of spleen cell populations for apoptotic and EV<sup>+</sup> cells**  
4 Among CD19<sup>+</sup> B cells, mainly marginal zone (MZ, CD19<sup>+</sup>CD21<sup>hi</sup>CD23<sup>lo</sup>) and follicular  
5 (CD19<sup>+</sup>CD21<sup>+</sup>CD23<sup>hi</sup>) B cells showed increased apoptosis, while only follicular B cells  
6 showed a significant increase in EV<sup>+</sup> cells during LCMV-infection (Fig. 6A). MZ B cells  
7 showed a very high degree of EV-decoration in both infected and non-infected animals  
8 (Fig. 6A). Among the CD19<sup>-</sup>TCRβ<sup>-</sup> non-B/T cell populations CD11c<sup>+</sup>MHCII<sup>+</sup> DCs showed  
9 slight but significant increases of apoptotic and EV<sup>+</sup> cells (Fig. 6B).

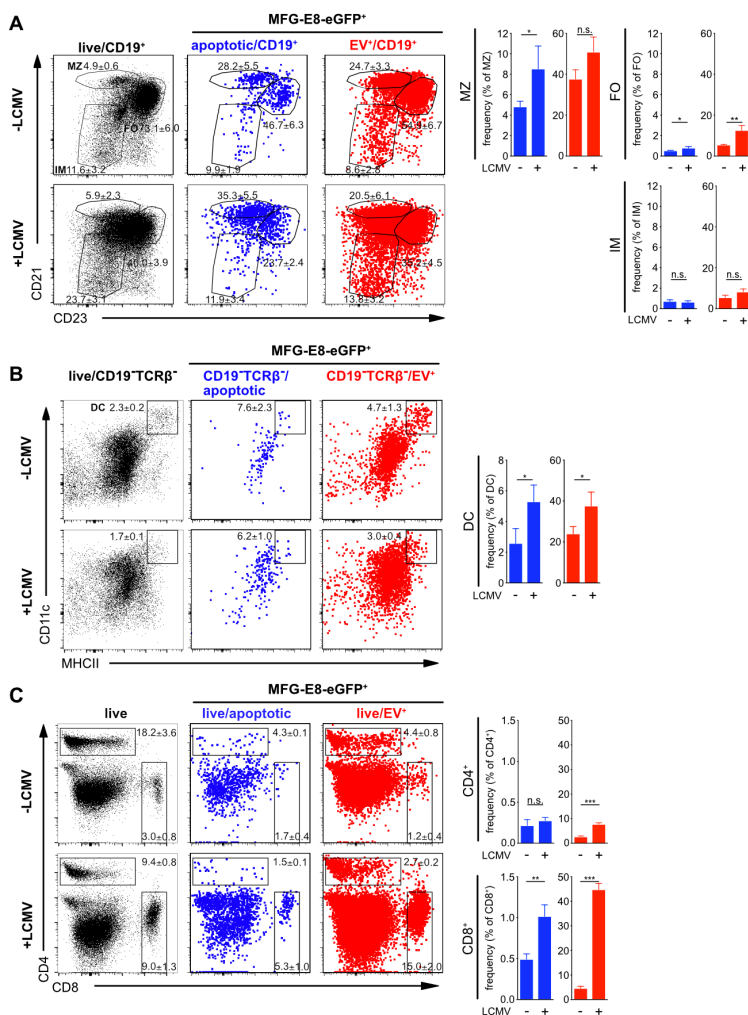

10

1 **Figure 6. CAE analysis of spleen cell populations during LCMV infection.** Non-  
2 infected and LCMV<sub>Arm</sub> (2x10<sup>5</sup> PFU, i.p.) infected mice were injected with 100µg MFG-E8-  
3 eGFP on day 5 post infection. 1h later mice were sacrificed and splenic cell subsets were  
4 analyzed by imaging flow cytometry (gating strategy shown in Suppl. Fig 4). (A) MFG-E-  
5 eGFP<sup>+</sup> CD19<sup>+</sup> B cell subsets (MZ = marginal zone, FO = follicular, IM = immature B cells),  
6 (B) CD19-TCRβ<sup>-</sup>CD11c<sup>+</sup>MHCII<sup>+</sup> DCs and (C) CD4<sup>+</sup> and CD8<sup>+</sup> T cells were analyzed using  
7 the CAE and the percentages of apoptotic and EV<sup>+</sup> cells determined and depicted in bar  
8 graphs. Numbers next to the gate show the mean percentage of 3 mice. Bar graphs show  
9 averages of 3 mice ± SD. For statistical analysis unpaired Student's T test was used,  
10 asterisks indicate statistical significance. Representative results of 3 independent  
11 experiments are shown.

12  
13 CD4<sup>+</sup> and CD8<sup>+</sup> T lymphocytes play central roles in controlling viral infections (Swain et  
14 al., 2012; Wong and Pamer, 2003). Analysis of spleens from LCMV infected mice showed  
15 that the frequencies of apoptotic cells increased during viral infection only among CD8<sup>+</sup> T  
16 cells, but not CD4<sup>+</sup> T cells (Fig. 6C). In contrast, while EV-decoration increased only  
17 slightly but statistically significantly also in CD4<sup>+</sup> T cells, it augmented drastically in CD8<sup>+</sup>  
18 T cells during LCMV infection, when 40-50% of EV<sup>+</sup>CD8<sup>+</sup> T cells were detected (Fig. 6C).  
19 While MZ B cells showed high EV-decoration regardless of LCMV infection, especially  
20 CD8<sup>+</sup> T cells became strongly EV<sup>+</sup> selectively upon acute LCMV infection. This data  
21 shows that Mfge8-eGFP *in vivo* in combination with CAE allows to precisely discriminate  
22 apoptotic cells from the vast majority of EV-decorated cells.

23

## 24 **EVs carry markers of exosomes and antigen-presenting cells**

25 We next set out to further characterize cell-attached EVs generated during LCMV-  
26 infection *in vivo* using the flow microscopy CAE-pipeline. EVs originating from professional  
27 APC like DCs carry exosomal markers such as tetraspanins CD9 and CD63 related to  
28 endosomal vesicle trafficking (Buschow et al., 2009; Zitvogel et al., 1998). In addition, they  
29 are enriched for DC-markers such as CD86, MHCII and CD54 (Segura et al., 2005). We

1 therefore evaluated next if EV<sup>+</sup>CD8<sup>+</sup> T cells are positive for these DC-exosome markers.  
2 Analysis of naïve CD44<sup>-</sup>CD8<sup>+</sup> T cells and effector CD44<sup>+</sup>CD8<sup>+</sup> T cells from the same  
3 LCMV-infected animal showed that EVs bound specifically to activated CD44<sup>+</sup>CD8<sup>+</sup> T  
4 cells, but not to resting CD44<sup>-</sup>CD8<sup>+</sup> T cells (Fig. 7A). We therefore focused on CD44<sup>+</sup>CD8<sup>+</sup>  
5 T cells for further analyses of EVs. We found approximately 80% CD9/CD63<sup>+</sup>, 99%  
6 CD54<sup>+</sup>, 78% MHCII<sup>+</sup> and 98% CD86<sup>+</sup> CD44<sup>+</sup>CD8<sup>+</sup> T cells (Fig. 7A). Several of these  
7 frequencies and median fluorescence intensities were significantly higher as compared to  
8 EV<sup>-</sup>CD44<sup>+</sup>CD8<sup>+</sup> T cells in infected mice (Fig. 7A), suggesting that decoration with MFG-  
9 E8<sup>+</sup> EVs contributes to the accumulation of APC-markers on effector CD8<sup>+</sup> T cells.

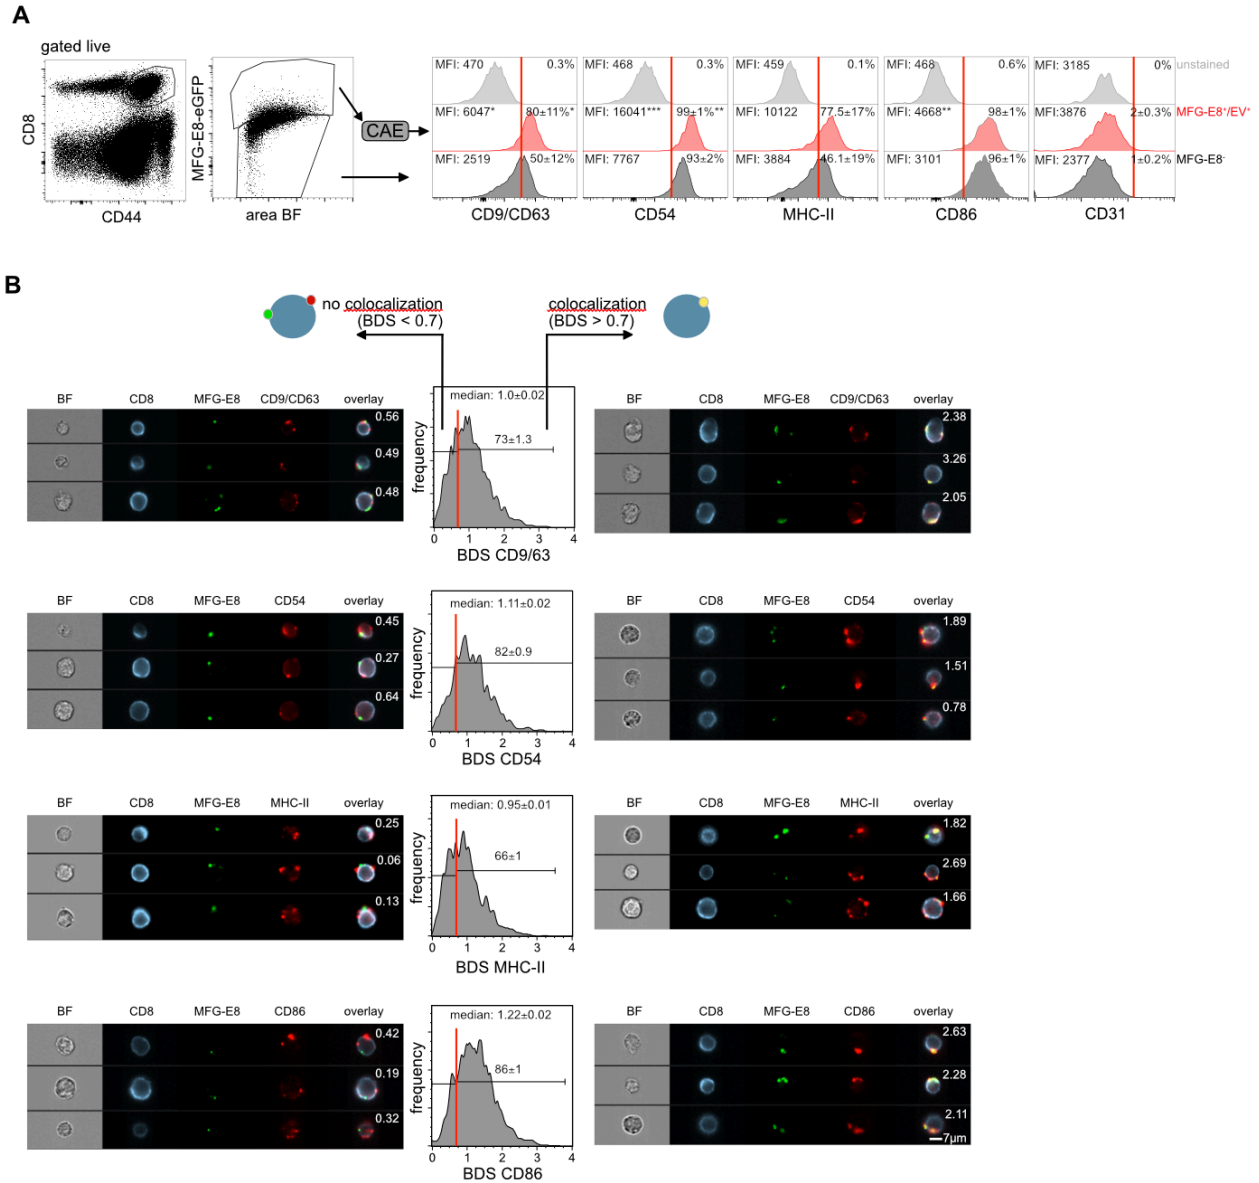

1

2 **Figure 7. EVs bound to CD8<sup>+</sup> T cells originate from APCs.**

3

4 (A) Splenic CD8<sup>+</sup> T cells of LCMV-infected mice (day 5 post infection, n=3) were analyzed  
5 for expression the activation marker CD44 and staining for MFG-E8. MFG-E8<sup>-</sup> and MFG-  
6 E8<sup>+</sup>/EV<sup>+</sup> CD44<sup>+</sup>CD8<sup>+</sup> T cells were then further analyzed for expression of potential EV-  
7 markers CD9/CD63 (combined in one staining), MHCII, CD54, CD86 and CD31. Median  
8 fluorescence intensities (MFI) and frequencies of cells positive for these proteins are  
9 indicated in the histograms. Asterisks indicate statistical significance. For statistical  
10 analysis Student's T test was used. (B) EV<sup>+</sup>EV-marker<sup>+</sup> cells were analyzed for their  
11 staining pattern of the respective EV-marker. Staining pattern of CD9/CD63, CD54, MHCII  
12 and CD86 was similar to MFG-E8<sup>+</sup> EVs. To determine if EV-marker staining co-localized  
13 with MFG-E8-eGFP<sup>+</sup> EVs overlap of both stainings was quantified using the bright detail  
14 similarity (BDS) feature of the IDEAS software. Cells with a BDS < 0.7 did not show any  
15 significant co-localization as determined by visual inspection. Cells with a BDS > 0.7

1 showed at least partial co-localization of MFG-E8 and the respective EV-marker. BDS  
2 scores are shown in the representative example images. Median BDS scores and  
3 frequency of cells showing co-localization are indicated within histograms.

4

5 To determine if these APC-molecules co-localized with MFG-E8-eGFP<sup>+</sup> EVs or showed a  
6 different distribution on the T cell surface, we used the “bright detail similarity” (BDS)  
7 feature, a standard co-localization method provided by the IDEAS software. Here, cells  
8 with a score <0.7 (Fig. 7B; left panel, BDS <0.7) showed no or weak co-localization, while  
9 cells with a score >0.7 (Fig. 7B; right panel, BDS >0.7) showed substantial co-localization.  
10 Analysis of the BDS score revealed that on 73% of all EV<sup>+</sup>CD9/63<sup>+</sup>CD8<sup>+</sup> T cells MFG-E8-  
11 eGFP and CD9/63 co-localized on the same EVs (Fig. 7B). We found similarly high  
12 frequencies of CD8<sup>+</sup> T cells with CD54 (82%), MHCII (66%) and CD86 (86%) co-localizing  
13 with MFG-E8-eGFP on the same EVs (Fig. 7B). The fact that we also found EVs where  
14 MFG-E8 did not colocalize with any of the above markers argues either for the existence  
15 of EVs where MFG-E8 staining was absent or below the detection limit, the generation of  
16 EVs during organ preparation in absence of sufficient amounts of *in vivo* applied MFG-  
17 E8-eGFP or other processes of protein transfer to activated T cells such as trogocytosis  
18 (Huang et al., 1999).

19 It has been shown that many CD31<sup>+</sup> endothelial cells undergo apoptosis during LCMV  
20 infection (Frebel et al., 2012). We therefore also assessed the presence of CD31 on EV<sup>+</sup>  
21 T cells to determine if apoptotic endothelial cells were the origin of T cell-associated EVs.  
22 However, we did not find a significant staining for CD31 on T cells (Fig. 7A), nor any CD31<sup>+</sup>  
23 vesicles on T cells (not shown). These results indicate that the great majority of EVs  
24 associated with CD8<sup>+</sup> T cells during LCMV infection are APC-derived exosomes.

25

## 1 **Discussion**

2 Here we report the *in vivo* application of recombinant Mfge8-eGFP for the detection of  
3 PS<sup>+</sup> cells using conventional and image flow cytometry. We show that Mfge8-eGFP binds  
4 similar fractions of PS<sup>+</sup> apoptotic cells *in vitro* as compared to the more widely used  
5 Annexin V. However, PS-binding of Mge8-eGFP is calcium independent and works after  
6 *in vivo* injection. Surprisingly, we found the majority of PS<sup>+</sup> cells in irradiated and LCMV-  
7 infected mice being not apoptotic, but alive and decorated with PS<sup>+</sup> EVs. Upon  
8 development of a deep learning autoencoder, we can faithfully separate both, true  
9 apoptotic cells and EV-decorated cells for further analyses.

10 The detection of cell death in tissues *in vivo* is challenging. Therefore, dead cell analyses  
11 are mostly performed *ex vivo* with single cell suspensions derived from the organs of  
12 interest after biopsies or sacrifice of experimental animals. However, this procedure  
13 exposes cells to additional stress factors such as shear forces by tissue homogenization,  
14 enzymes, temperature and pH changes, salt compositions of working solutions and many  
15 more. Hence, tissue preparation for dead cell analysis *ex vivo* might artificially increase  
16 cell death rates due to handling. In addition, most methods to measure apoptotic cells  
17 have intrinsic restrictions, adding to their imprecision of analyzing cell death. For example,  
18 labeling of fragmented DNA by TUNEL (terminal deoxynucleotidyl transferase dUTP nick  
19 end labeling) mostly detects late stage apoptotic cells only (Negoescu et al., 1996), which  
20 are very rapidly cleared *in situ*, as most DNA fragmentation of dying cells occurs inside  
21 phagocytes (Odaka and Mizuochi, 2002). Measuring the active form of caspase-3 using  
22 fluorescent substrates is not completely specific, as caspase-3 is also activated  
23 independently of cell death in certain cell types (McComb et al., 2010). The *ex vivo*  
24 staining of cells for surface phosphatidylserine (PS) using Annexin V has the

1 disadvantage to require high Ca<sup>2+</sup>-levels, precluding it from most *in vivo* applications and  
2 interfering with many other downstream applications (van Engeland et al., 1998). MFG-  
3 E8, also known as lactadherin, also binds to PS on apoptotic cells and enhances their  
4 engulfment by phagocytes (Hanayama et al., 2002). Translocation of PS to the outer  
5 membrane not only occurs during apoptosis, but also during the formation of  
6 microvesicles (Hugel et al., 2005; Martinez and Freyssinet, 2001) and exosomes (They  
7 et al., 2002), allowing detection of PS<sup>+</sup> EVs by MFG-E8-eGFP.

8 Although we could detect many MFG-E8<sup>+</sup> cells, true apoptotic cells were rare in spleens  
9 and BM of control mice, while the great majority were EV-decorated live cells. Due to their  
10 great morphological variability, a reliable discrimination was not possible using fluorescent  
11 intensity of the MFG-E8 signal only. Also, a combination of two features that worked well  
12 on manually selected apoptotic and EV-decorated cells failed in more complex samples.  
13 Only *in vivo* administered MFG-E8-eGFP in combination with imaging flow cytometry and  
14 a deep learning approach using a CAE-RF allowed us to reliably classify the MFG-E8<sup>+</sup>  
15 cells into PS<sup>+</sup> apoptotic or PS<sup>+</sup> EV-decorated cells. Previous reports showed substantial  
16 death among T cells during the early phase (day 2-4) of infection LCMV infection (Bahl et  
17 al., 2010), which is dependent on type I interferon production (Crouse et al., 2015) and  
18 even affects nonspecific bystander cells (Jiang et al., 2003). In contrast, we could identify  
19 only low numbers of dying cells in acutely LCMV infected mice. The reason for this  
20 discrepancy could lie in the different methods to identify dying cells or could be due to  
21 different time points of analysis.

22 Another striking finding is the dramatic increase in cells that bind EVs. On the one hand  
23 these vesicles could be virus-containing particles infecting new cells, or apoptotic bodies  
24 reflecting the increased amount of cell death. However, given the wide range of

1 immunoregulatory functions of EVs (Robbins and Morelli, 2014), the increase in EVs could  
2 also be a consequence of the ongoing immune response. The fact that especially B cells  
3 and activated CD8<sup>+</sup> T cells bind these EVs, supports this idea. It has been shown  
4 previously that activated DCs secrete MHC class II containing exosomes, which bind to  
5 activated CD4<sup>+</sup> T cell via LFA-1 (Nolte-'t Hoen et al., 2009) and could play a role in T cell  
6 activation (Buschow et al., 2009). Evidence for their strong immunostimulatory function  
7 came from early exosome studies demonstrating the capability of tumor-antigen bearing  
8 exosomes secreted from DCs to trigger T-cell dependent anti-tumor responses (Zitvogel  
9 et al., 1998). However, in our study CD4<sup>+</sup> T cells were not as strongly EV-decorated as  
10 compared to CD8<sup>+</sup> T cells in LCMV-infected mice. Previous reports showed that vesicles  
11 derived from DCs were able to stimulate CD8 T cells *in vitro* (Kovar et al., 2006) and  
12 transfer exogenous antigen to DCs for CD8<sup>+</sup> (Winau et al., 2006) and CD4<sup>+</sup> T cell priming  
13 (Montecalvo et al., 2008).

14 Approximately half of all CD8<sup>+</sup> T cells were EV-decorated during LCMV infection. This  
15 could indicate that either those T cells were targeted by EVs produced by other cells, or  
16 that we detected nascent EVs produced by T cells themselves. Both scenarios are  
17 possible. It has been shown that TNF $\alpha$ -containing exosomes were able to delay  
18 activation-induced cell death in T cells (Zhang et al., 2006). On the other hand, T cells  
19 release EVs constitutively and EV secretion is enhanced by TCR triggering (Blanchard et  
20 al., 2002; van der Vlist et al., 2012), which causes increased intracellular calcium levels  
21 for enhanced EV-production (Savina et al., 2003). Moreover, EVs from CD8<sup>+</sup> T cells may  
22 also contain granzyme and perforin (Peters et al., 1991) and can inhibit antigen  
23 presentation and survival of DCs to downmodulate immune responses in mouse models  
24 of cancer and diabetes (Xie et al., 2010). In addition, microvesicles budding from the



1 immunological synapses of CD4 T cells *in vitro* do contain TCR, which may transfer  
2 signals to B cells expressing cognate peptide MHCII (Choudhuri et al., 2014). However,  
3 our finding that MFG-E8+ EVs carry DC-markers such as MHCII, CD86, CD54 and  
4 tetraspanins rather argue for the exosomal APC-origin of these EVs.

5 Also, many B cells carried vesicles, even in non-infected mice. EVs can be a source of  
6 native, unprocessed antigen (Qazi et al., 2009) and in the case of virus infections they  
7 could carry intact viral proteins (Nolte-'t Hoen et al., 2016) for recognition by cognate B-  
8 cell receptors causing B cell activation. In addition, previous studies described B cells  
9 becoming Annexin V positive, without undergoing apoptosis (Dillon et al., 2001). While  
10 the authors described that PS-exposure was selective for B cells upon their IgM-mediated  
11 positive selection, they did not determine, if PS-exposure was cell-intrinsic or by EV-  
12 decoration.

13 Further studies are necessary to determine if EV binding is restricted to certain zones of  
14 lymphatic organs, such as the MZ, where blood is filtered. Cells in the MZ, such as MZ B  
15 cells, CD11c<sup>+</sup>CD11b<sup>-</sup> DCs and activated T cells locate to this region and could therefore  
16 be preferentially exposed to EVs. However, the fact that also follicular B cells are EV-  
17 decorated argues against this possibility.

18 To our knowledge, this is the first report that identifies cell subsets binding naturally  
19 occurring EVs *in vivo*. *In vivo* staining of dying cells and EV-decorated cells using Mfge8-  
20 eGFP is a valuable tool, not only to reliably identify cells that undergo cell death in different  
21 pathological conditions, but also to clarify the function of EVs on different cell types in  
22 various tissues under normal and pathological conditions, such as viral infections,  
23 autoimmunity and cancer.

24

## 1 **ACKNOWLEDGEMENTS**

2 We acknowledge the Core Facility Flow Cytometry at the Biomedical Center, Ludwig-  
3 Maxmilians-Universität München, for providing the ImageStream<sup>X</sup> MKII imaging flow  
4 cytometer. N.K.C., A.L., T.K. were supported by a Deutsche Forschungsgemeinschaft  
5 (DFG, German Research Foundation) fellowship through the Graduate School of  
6 Quantitative Biosciences Munich (QBM) and N.K.C. is supported additionally through the  
7 School of Life Sciences Weihenstephan, Technical University of Munich, Germany. F.J.T.  
8 acknowledges financial support by the Graduate School QBM, the DFG within the  
9 Collaborative Research Centre (CRC) 1243 (Subproject A17), by the Helmholtz  
10 Association (Incubator grant sparse2big, grant # ZT-I-0007), by the BMBF (grant#  
11 01IS18036A and grant# 01IS18053A) and by the Chan Zuckerberg Initiative DAF (advised  
12 fund of Silicon Valley Community Foundation, 182835). T.B. is supported by the DFG  
13 CRC 1054 (TP B03) and Graduate School QBM. This work was funded by the DFG under  
14 Germany's Excellence Strategy within the framework of the Munich Cluster for Systems  
15 Neurology (EXC 2145 SyNergy – ID 390857198) to M.K.

16

## 17 **AUTHOR CONTRIBUTIONS**

18 N.K.C. and F.J.T. developed the deep learning model and the data analysis pipeline. T.B.  
19 and J.K. planned experiments and wrote the paper. L.R., A.L., A.F.-A.K. and T.K.  
20 performed experiments. M.SCH. and M.S. provided electron microscopy expertise.

21

## 22 **DECLARATION OF INTERESTS**

23 The authors declare no competing financial interests.

1

2

### 3 REFERENCES

- 4 Altan-Bonnet, N. (2016). Extracellular vesicles are the Trojan horses of viral infection. *Curr*  
5 *Opin Microbiol* 32, 77-81.
- 6 Andersen, M.H., Graversen, H., Fedosov, S.N., Petersen, T.E., and Rasmussen, J.T.  
7 (2000). Functional analyses of two cellular binding domains of bovine lactadherin.  
8 *Biochemistry* 39, 6200-6206.
- 9 Ashkenazi, A., and Salvesen, G. (2014). Regulated cell death: signaling and mechanisms.  
10 *Annu Rev Cell Dev Biol* 30, 337-356.
- 11 Bahl, K., Huebner, A., Davis, R.J., and Welsh, R.M. (2010). Analysis of apoptosis of  
12 memory T cells and dendritic cells during the early stages of viral infection or exposure to  
13 toll-like receptor agonists. *J Virol* 84, 4866-4877.
- 14 Blanchard, N., Lankar, D., Faure, F., Regnault, A., Dumont, C., Raposo, G., and Hivroz,  
15 C. (2002). TCR activation of human T cells induces the production of exosomes bearing  
16 the TCR/CD3/zeta complex. *Journal of immunology (Baltimore, Md : 1950)* 168, 3235-  
17 3241.
- 18 Blasi, T., Hennig, H., Summers, H.D., Theis, F.J., Cerveira, J., Patterson, J.O., Davies,  
19 D., Filby, A., Carpenter, A.E., and Rees, P. (2016). Label-free cell cycle analysis for high-  
20 throughput imaging flow cytometry. *Nature communications* 7, 10256.
- 21 Borrow, P., Evans, C.F., and Oldstone, M.B. (1995). Virus-induced immunosuppression:  
22 immune system-mediated destruction of virus-infected dendritic cells results in  
23 generalized immune suppression. *J Virol* 69, 1059-1070.
- 24 Breiman, L. (2001). Random Forests. *Machine Learning* 45, 5-32.
- 25 Buschow, S.I., Nolte-'t Hoen, E.N., van Niel, G., Pols, M.S., ten Broeke, T., Lauwen, M.,  
26 Ossendorp, F., Melief, C.J., Raposo, G., Wubbolts, R., *et al.* (2009). MHC II in dendritic  
27 cells is targeted to lysosomes or T cell-induced exosomes via distinct multivesicular body  
28 pathways. *Traffic (Copenhagen, Denmark)* 10, 1528-1542.
- 29 Choudhuri, K., Llodra, J., Roth, E.W., Tsai, J., Gordo, S., Wucherpfennig, K.W., Kam,  
30 L.C., Stokes, D.L., and Dustin, M.L. (2014). Polarized release of T-cell-receptor-enriched  
31 microvesicles at the immunological synapse. *Nature* 507, 118-123.
- 32 Crouse, J., Kalinke, U., and Oxenius, A. (2015). Regulation of antiviral T cell responses  
33 by type I interferons. *Nature reviews Immunology* 15, 231-242.
- 34 Dao, D., Fraser, A.N., Hung, J., Ljosa, V., Singh, S., and Carpenter, A.E. (2016).  
35 CellProfiler Analyst: interactive data exploration, analysis and classification of large  
36 biological image sets. *Bioinformatics (Oxford, England)* 32, 3210-3212.
- 37 deCathelineau, A.M., and Henson, P.M. (2003). The final step in programmed cell death:  
38 phagocytes carry apoptotic cells to the grave. *Essays Biochem* 39, 105-117.
- 39 Dillon, S.R., Constantinescu, A., and Schlissel, M.S. (2001). Annexin V binds to positively  
40 selected B cells. *Journal of immunology (Baltimore, Md : 1950)* 166, 58-71.

- 1 Eliceiri, K.W., Berthold, M.R., Goldberg, I.G., Ibanez, L., Manjunath, B.S., Martone, M.E.,  
2 Murphy, R.F., Peng, H., Plant, A.L., Roysam, B., *et al.* (2012). Biological imaging software  
3 tools. *Nature methods* 9, 697-710.
- 4 Eriksson, D., and Stigbrand, T. (2010). Radiation-induced cell death mechanisms. *Tumour*  
5 *Biol* 31, 363-372.
- 6 Eulenberg, P., Kohler, N., Blasi, T., Filby, A., Carpenter, A.E., Rees, P., Theis, F.J., and  
7 Wolf, F.A. (2017). Reconstructing cell cycle and disease progression using deep learning.  
8 *Nature communications* 8, 463.
- 9 Fadok, V.A., Voelker, D.R., Campbell, P.A., Cohen, J.J., Bratton, D.L., and Henson, P.M.  
10 (1992). Exposure of phosphatidylserine on the surface of apoptotic lymphocytes triggers  
11 specific recognition and removal by macrophages. *Journal of immunology (Baltimore, Md*  
12 *: 1950)* 148, 2207-2216.
- 13 Frebel, H., Nindl, V., Schuepbach, R.A., Braunschweiler, T., Richter, K., Vogel, J.,  
14 Wagner, C.A., Loffing-Cueni, D., Kurrer, M., Ludewig, B., *et al.* (2012). Programmed death  
15 1 protects from fatal circulatory failure during systemic virus infection of mice. *The Journal*  
16 *of experimental medicine* 209, 2485-2499.
- 17 George, T.C., Basiji, D.A., Hall, B.E., Lynch, D.H., Ortyn, W.E., Perry, D.J., Seo, M.J.,  
18 Zimmerman, C.A., and Morrissey, P.J. (2004). Distinguishing modes of cell death using  
19 the ImageStream multispectral imaging flow cytometer. *Cytometry Part A : the journal of*  
20 *the International Society for Analytical Cytology* 59, 237-245.
- 21 Hanayama, R., Tanaka, M., Miwa, K., Shinohara, A., Iwamatsu, A., and Nagata, S. (2002).  
22 Identification of a factor that links apoptotic cells to phagocytes. *Nature* 417, 182-187.
- 23 Hastie, T.J., Tibshirani, R.J., and Friedman, J.H. (2009). *The elements of statistical*  
24 *learning : data mining, inference, and prediction*, 2 edn (New York: Springer).
- 25 Headland, S.E., Jones, H.R., D'Sa, A.S., Perretti, M., and Norling, L.V. (2014). Cutting-  
26 edge analysis of extracellular microparticles using ImageStream(X) imaging flow  
27 cytometry. *Sci Rep* 4, 5237.
- 28 Heijnen, H.F., Schiel, A.E., Fijnheer, R., Geuze, H.J., and Sixma, J.J. (1999). Activated  
29 platelets release two types of membrane vesicles: microvesicles by surface shedding and  
30 exosomes derived from exocytosis of multivesicular bodies and alpha-granules. *Blood* 94,  
31 3791-3799.
- 32 Henson, P.M., and Hume, D.A. (2006). Apoptotic cell removal in development and tissue  
33 homeostasis. *Trends Immunol* 27, 244-250.
- 34 Heylmann, D., Rodel, F., Kindler, T., and Kaina, B. (2014). Radiation sensitivity of human  
35 and murine peripheral blood lymphocytes, stem and progenitor cells. *Biochim Biophys*  
36 *Acta* 1846, 121-129.
- 37 Hinton, G.E., and Salakhutdinov, R.R. (2006). Reducing the Dimensionality of Data with  
38 Neural Networks. *Science (New York, NY)* 313, 504-507.
- 39 Huang, J.F., Yang, Y., Sepulveda, H., Shi, W., Hwang, I., Peterson, P.A., Jackson, M.R.,  
40 Sprent, J., and Cai, Z. (1999). TCR-Mediated internalization of peptide-MHC complexes  
41 acquired by T cells. *Science (New York, NY)* 286, 952-954.

- 1 Hugel, B., Martinez, M.C., Kunzelmann, C., and Freyssinet, J.M. (2005). Membrane  
2 microparticles: two sides of the coin. *Physiology (Bethesda)* *20*, 22-27.
- 3 Jeppesen, D.K., Fenix, A.M., Franklin, J.L., Higginbotham, J.N., Zhang, Q., Zimmerman,  
4 L.J., Liebler, D.C., Ping, J., Liu, Q., Evans, R., *et al.* (2019). Reassessment of Exosome  
5 Composition. *Cell* *177*, 428-445 e418.
- 6 Jiang, J., Lau, L.L., and Shen, H. (2003). Selective depletion of nonspecific T cells during  
7 the early stage of immune responses to infection. *Journal of immunology (Baltimore, Md*  
8 *: 1950)* *171*, 4352-4358.
- 9 Kingma, D.P., and Ba, J.L. (2014). Adam: A Method for stochastic Optimization. *CoRR*  
10 *abs/1412.6980*.
- 11 Kovar, M., Boyman, O., Shen, X., Hwang, I., Kohler, R., and Sprent, J. (2006). Direct  
12 stimulation of T cells by membrane vesicles from antigen-presenting cells. *Proceedings*  
13 *of the National Academy of Sciences of the United States of America* *103*, 11671-11676.
- 14 Larson, M.C., Luthi, M.R., Hogg, N., and Hillery, C.A. (2013). Calcium-phosphate  
15 microprecipitates mimic microparticles when examined with flow cytometry. *Cytometry*  
16 *Part A : the journal of the International Society for Analytical Cytology* *83*, 242-250.
- 17 Llorente, A., Skotland, T., Sylvanne, T., Kauhanen, D., Rog, T., Orlowski, A., Vattulainen,  
18 I., Ekroos, K., and Sandvig, K. (2013). Molecular lipidomics of exosomes released by PC-  
19 3 prostate cancer cells. *Biochim Biophys Acta* *1831*, 1302-1309.
- 20 Martin, S.J., Reutelingsperger, C.P., McGahon, A.J., Rader, J.A., van Schie, R.C.,  
21 LaFace, D.M., and Green, D.R. (1995). Early redistribution of plasma membrane  
22 phosphatidylserine is a general feature of apoptosis regardless of the initiating stimulus:  
23 inhibition by overexpression of Bcl-2 and Abl. *The Journal of experimental medicine* *182*,  
24 1545-1556.
- 25 Martinez, M.C., and Freyssinet, J.M. (2001). Deciphering the plasma membrane  
26 hallmarks of apoptotic cells: phosphatidylserine transverse redistribution and calcium  
27 entry. *BMC Cell Biol* *2*, 20.
- 28 Masci, J., Meier, U., Cireşan, D., and Schmidhuber, J. (2011). Stacked Convolutional  
29 Auto-Encoders for Hierarchical Feature Extraction (Berlin, Heidelberg: Springer Berlin  
30 Heidelberg).
- 31 Mathieu, M., Martin-Jaular, L., Lavieu, G., and Thery, C. (2019). Specificities of secretion  
32 and uptake of exosomes and other extracellular vesicles for cell-to-cell communication.  
33 *Nat Cell Biol* *21*, 9-17.
- 34 Matter, M., Odermatt, B., Yagita, H., Nuoffer, J.M., and Ochsenbein, A.F. (2006).  
35 Elimination of chronic viral infection by blocking CD27 signaling. *The Journal of*  
36 *experimental medicine* *203*, 2145-2155.
- 37 McComb, S., Mulligan, R., and Sad, S. (2010). Caspase-3 is transiently activated without  
38 cell death during early antigen driven expansion of CD8(+) T cells in vivo. *PloS one* *5*,  
39 e15328.
- 40 Montecalvo, A., Shufesky, W.J., Stolz, D.B., Sullivan, M.G., Wang, Z., Divito, S.J.,  
41 Papworth, G.D., Watkins, S.C., Robbins, P.D., Larregina, A.T., *et al.* (2008). Exosomes

- 1 as a short-range mechanism to spread alloantigen between dendritic cells during T cell  
2 allorecognition. *Journal of immunology* (Baltimore, Md : 1950) *180*, 3081-3090.
- 3 Nagata, S. (2018). Apoptosis and Clearance of Apoptotic Cells. *Annu Rev Immunol* *36*,  
4 489-517.
- 5 Negoescu, A., Lorimier, P., Labat-Moleur, F., Drouet, C., Robert, C., Guillermet, C.,  
6 Brambilla, C., and Brambilla, E. (1996). In situ apoptotic cell labeling by the TUNEL  
7 method: improvement and evaluation on cell preparations. *J Histochem Cytochem* *44*,  
8 959-968.
- 9 Nolte-'t Hoen, E., Cremer, T., Gallo, R.C., and Margolis, L.B. (2016). Extracellular vesicles  
10 and viruses: Are they close relatives? *Proceedings of the National Academy of Sciences*  
11 *of the United States of America* *113*, 9155-9161.
- 12 Nolte-'t Hoen, E.N., Buschow, S.I., Anderton, S.M., Stoorvogel, W., and Wauben, M.H.  
13 (2009). Activated T cells recruit exosomes secreted by dendritic cells via LFA-1. *Blood*  
14 *113*, 1977-1981.
- 15 Odaka, C., and Mizuochi, T. (2002). Macrophages are involved in DNA degradation of  
16 apoptotic cells in murine thymus after administration of hydrocortisone. *Cell death and*  
17 *differentiation* *9*, 104-112.
- 18 Odermatt, B., Eppler, M., Leist, T.P., Hengartner, H., and Zinkernagel, R.M. (1991). Virus-  
19 triggered acquired immunodeficiency by cytotoxic T-cell-dependent destruction of  
20 antigen-presenting cells and lymph follicle structure. *Proceedings of the National*  
21 *Academy of Sciences of the United States of America* *88*, 8252-8256.
- 22 Otzen, D.E., Blans, K., Wang, H., Gilbert, G.E., and Rasmussen, J.T. (2012). Lactadherin  
23 binds to phosphatidylserine-containing vesicles in a two-step mechanism sensitive to  
24 vesicle size and composition. *Biochim Biophys Acta* *1818*, 1019-1027.
- 25 Pedregosa, F., Varoquaux, G., Gramfort, A., Michel, V., Thirion, B., Grisel, O., Blondel,  
26 M., Prettenhofer, P., Weiss, R., Dubourg, V., *et al.* (2011). Scikit-learn: Machine Learning  
27 in Python. *Journal of Machine Learning Research* *12*, 2825-2830.
- 28 Pellegrini, M., Calzascia, T., Toe, J.G., Preston, S.P., Lin, A.E., Elford, A.R., Shahinian,  
29 A., Lang, P.A., Lang, K.S., Morre, M., *et al.* (2011). IL-7 engages multiple mechanisms to  
30 overcome chronic viral infection and limit organ pathology. *Cell* *144*, 601-613.
- 31 Pepperkok, R., and Ellenberg, J. (2006). High-throughput fluorescence microscopy for  
32 systems biology. *Nature reviews Molecular cell biology* *7*, 690-696.
- 33 Peters, P.J., Borst, J., Oorschot, V., Fukuda, M., Krahenbuhl, O., Tschopp, J., Slot, J.W.,  
34 and Geuze, H.J. (1991). Cytotoxic T lymphocyte granules are secretory lysosomes,  
35 containing both perforin and granzymes. *The Journal of experimental medicine* *173*, 1099-  
36 1109.
- 37 Qazi, K.R., Gehrman, U., Domange Jordo, E., Karlsson, M.C., and Gabrielsson, S.  
38 (2009). Antigen-loaded exosomes alone induce Th1-type memory through a B-cell-  
39 dependent mechanism. *Blood* *113*, 2673-2683.
- 40 Ranzato, M., Huang, F.J., Boureau, Y.L., and LeCun, Y. (2007). Unsupervised Learning  
41 of Invariant Feature Hierarchies with Applications to Object Recognition. 2007 IEEE  
42 Conference on Computer Vision and Pattern Recognition

- 1 , 1-8.
- 2 Robbins, P.D., and Morelli, A.E. (2014). Regulation of immune responses by extracellular  
3 vesicles. *Nature reviews Immunology* 14, 195-208.
- 4 Rodrigues-Moreira, S., Moreno, S.G., Ghinatti, G., Lewandowski, D., Hoffschir, F., Ferri,  
5 F., Gallouet, A.S., Gay, D., Motohashi, H., Yamamoto, M., *et al.* (2017). Low-Dose  
6 Irradiation Promotes Persistent Oxidative Stress and Decreases Self-Renewal in  
7 Hematopoietic Stem Cells. *Cell Rep* 20, 3199-3211.
- 8 Savina, A., Furlan, M., Vidal, M., and Colombo, M.I. (2003). Exosome release is regulated  
9 by a calcium-dependent mechanism in K562 cells. *J Biol Chem* 278, 20083-20090.
- 10 Segura, E., Nicco, C., Lombard, B., Veron, P., Raposo, G., Batteux, F., Amigorena, S.,  
11 and Thery, C. (2005). ICAM-1 on exosomes from mature dendritic cells is critical for  
12 efficient naive T-cell priming. *Blood* 106, 216-223.
- 13 Shi, J., Heegaard, C.W., Rasmussen, J.T., and Gilbert, G.E. (2004). Lactadherin binds  
14 selectively to membranes containing phosphatidyl-L-serine and increased curvature.  
15 *Biochim Biophys Acta* 1667, 82-90.
- 16 Shi, J., Shi, Y., Waehrens, L.N., Rasmussen, J.T., Heegaard, C.W., and Gilbert, G.E.  
17 (2006). Lactadherin detects early phosphatidylserine exposure on immortalized leukemia  
18 cells undergoing programmed cell death. *Cytometry Part A : the journal of the International*  
19 *Society for Analytical Cytology* 69, 1193-1201.
- 20 Surh, C.D., and Sprent, J. (1994). T-cell apoptosis detected in situ during positive and  
21 negative selection in the thymus. *Nature* 372, 100-103.
- 22 Swain, S.L., McKinstry, K.K., and Strutt, T.M. (2012). Expanding roles for CD4(+) T cells  
23 in immunity to viruses. *Nature reviews Immunology* 12, 136-148.
- 24 Thery, C., Zitvogel, L., and Amigorena, S. (2002). Exosomes: composition, biogenesis  
25 and function. *Nature reviews Immunology* 2, 569-579.
- 26 Tkach, M., and Thery, C. (2016). Communication by Extracellular Vesicles: Where We  
27 Are and Where We Need to Go. *Cell* 164, 1226-1232.
- 28 van der Vlist, E.J., Arkesteijn, G.J., van de Lest, C.H., Stoorvogel, W., Nolte-'t Hoen, E.N.,  
29 and Wauben, M.H. (2012). CD4(+) T cell activation promotes the differential release of  
30 distinct populations of nanosized vesicles. *J Extracell Vesicles* 1.
- 31 van Engeland, M., Nieland, L.J., Ramaekers, F.C., Schutte, B., and Reutelingsperger,  
32 C.P. (1998). Annexin V-affinity assay: a review on an apoptosis detection system based  
33 on phosphatidylserine exposure. *Cytometry* 31, 1-9.
- 34 Wilson, E.B. (1927). Probable inference, the law of succession, and statistical inference.  
35 *Journal of the American Statistical Association* 22, 209-212.
- 36 Winau, F., Weber, S., Sad, S., de Diego, J., Hoops, S.L., Breiden, B., Sandhoff, K.,  
37 Brinkmann, V., Kaufmann, S.H., and Schaible, U.E. (2006). Apoptotic vesicles crossprime  
38 CD8 T cells and protect against tuberculosis. *Immunity* 24, 105-117.
- 39 Wong, P., and Pamer, E.G. (2003). CD8 T cell responses to infectious pathogens. *Annu*  
40 *Rev Immunol* 21, 29-70.

- 1 Wubbolts, R., Leckie, R.S., Veenhuizen, P.T., Schwarzmann, G., Mobius, W.,  
2 Hoernschemeyer, J., Slot, J.W., Geuze, H.J., and Stoorvogel, W. (2003). Proteomic and  
3 biochemical analyses of human B cell-derived exosomes. Potential implications for their  
4 function and multivesicular body formation. *J Biol Chem* 278, 10963-10972.
- 5 Xie, Y., Zhang, H., Li, W., Deng, Y., Munegowda, M.A., Chibbar, R., Qureshi, M., and  
6 Xiang, J. (2010). Dendritic cells recruit T cell exosomes via exosomal LFA-1 leading to  
7 inhibition of CD8+ CTL responses through downregulation of peptide/MHC class I and  
8 Fas ligand-mediated cytotoxicity. *Journal of immunology (Baltimore, Md : 1950)* 185,  
9 5268-5278.
- 10 Zhang, H.G., Liu, C., Su, K., Yu, S., Zhang, L., Zhang, S., Wang, J., Cao, X., Grizzle, W.,  
11 and Kimberly, R.P. (2006). A membrane form of TNF-alpha presented by exosomes  
12 delays T cell activation-induced cell death. *Journal of immunology (Baltimore, Md : 1950)*  
13 176, 7385-7393.
- 14 Zitvogel, L., Regnault, A., Lozier, A., Wolfers, J., Flament, C., Tenza, D., Ricciardi-  
15 Castagnoli, P., Raposo, G., and Amigorena, S. (1998). Eradication of established murine  
16 tumors using a novel cell-free vaccine: dendritic cell-derived exosomes. *Nature medicine*  
17 4, 594-600.
- 18
